# Supplementary material for: Auxiliary-directed etherification of sp2 C–H bonds under heterogeneous metal–organic framework catalysis: synthesis of ethenzamide
Source: Royal Society of Chemistry journal article supplement (doi:10.1039/c7ra12010a), 2018-01-01

**Auxiliary-directed etherification of  $sp^2$ C-H bonds under heterogeneous metal-organic framework catalysis: synthesis of Ethenzamide**

Chau B. Tran,<sup>†</sup> Xuan N. T. Duong,<sup>†</sup> Huy D. Lu, Thu T. V. Cao, Thanh Truong<sup>\*</sup>

Department of Chemical Engineering, Ho Chi Minh University of Technology, VNU-HCM,  
268 Ly Thuong Kiet, District 10, Ho Chi Minh City, Viet Nam

<sup>†</sup> These authors contributed equally.

<sup>\*</sup> Email: [truongvuthanh@gmail.com](mailto:truongvuthanh@gmail.com) or [tvthanh@hcmut.edu.vn](mailto:tvthanh@hcmut.edu.vn)

**SUPPORTING INFORMATION**

## Materials and instrumentation

All reagents and starting materials were obtained commercially from Sigma-Aldrich and Merck, and were used as received without any further purification unless otherwise noted. Powder X-ray diffraction patterns (PXRD) were collected using a BrukerD8 Advance equipped with a Ni filtered Cu K $\alpha$  radiation ( $\lambda = 1.54178 \text{ \AA}$ ) source. The diffractometer was also equipped with an anti-scattering shield that prevented incident diffuse radiation from hitting the detector. Nitrogen physisorption measurements were conducted using a Micromeritics 2020 volumetric adsorption analyzer system. Samples were pretreated by heating under vacuum at 150 °C for 3 h. A NetzschThermoanalyzerSTA 409 was used for thermogravimetric analysis (TGA) with a heating rate of 10 °C/min under a nitrogen atmosphere. Scanning electron microscopy studies were conducted on a JSM 740 scanning electron microscope (SEM). Transmission electron microscopy studies were performed using a JEOLJEM 1400 Transmission Electron Microscope (TEM) at 100 kV. Fourier-transform infrared (FT-IR) spectra were obtained on a Nicolet 6700 instrument, with samples being dispersed on potassium bromide pellets. The chemisorption experiments were studied in a Micromeritics 2020 analyzer. Gas chromatographic (GC) analyses were performed using a Shimadzu GC 2010-Plus equipped with a flame ionization detector (FID) and an SPB-5 column (length = 30 m, inner diameter = 0.25 mm, and film thickness = 0.25  $\mu\text{m}$ ). The temperature program for GC analysis held samples at 120 °C for 1 min; heated them from 120 to 180 °C at 50 °C/min; held them at 180 °C for 1 min; heated them from 180 to 280 °C at 50 °C/min and held them at 280 °C for 3 min. Inlet and detector temperatures were set constant at 280 °C. 1,2-Dichlorobenzene was used as an internal standard to calculate reaction yields. GC-MS analyses were performed using a Hewlett Packard GC-MS 5972 with a RTX-5MS column (length = 30 m, inner diameter = 0.25 mm, and film thickness = 0.5  $\mu\text{m}$ ). The

temperature program for GC-MS analysis heated samples from 60 to 280 °C at 10°C/min and held them at 280 °C for 2 min. Inlet temperature was set constant at 280 °C. MS spectra were compared with the spectra gathered in the NIST library. <sup>1</sup>H and <sup>13</sup>CNMR spectra were recorded in CDCl<sub>3</sub> using TMS as an internal standard on a BrukerNMR spectrometer at 500 MHz and 125 MHz, respectively.

To investigate the recyclability of Cu-MOF-74, the catalyst was separated from the reaction mixture by simple filtration, washed with copious amounts of DMF and methanol, dried 150°C under vacuum in 4 h.

### Leaching test procedure

For the leaching test, a catalytic reaction was stopped after 10 hours. The resulting mixture was analyzed by GC to calculation reaction yield. The mixture was then filtered and to remove the solid catalyst. To provide better accuracy on catalyst heterogeneity, both filtration at room temperature and hot filtration were conducted. The filtrate was then stirred for a further 14 hours at optimized reaction conditions. Reaction progress, if any, was monitored in both cases by GC as previously described.

**Table S1. Catalyst synthesis**

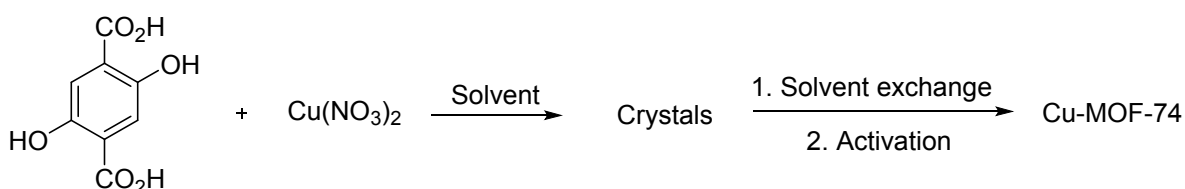

| Entry    | Reaction solvent       | Metal/linker ratio | Exchange solvent | Yield     |
|----------|------------------------|--------------------|------------------|-----------|
| 1        | DMF/H <sub>2</sub> O   | 2.1                | MeOH             | 58        |
| <b>2</b> | <b>DMF/Isopropanol</b> | <b>2.1</b>         | <b>MeOH</b>      | <b>62</b> |
| 3        | DMF/Isopropanol        | 1.8                | MeOH             | 47        |
| 4        | DMF/Isopropanol        | 2.3                | MeOH             | 64        |
| 5        | DMF/Isopropanol        | 2.1                | Isopropanol      | 58        |

## Catalysts characterization

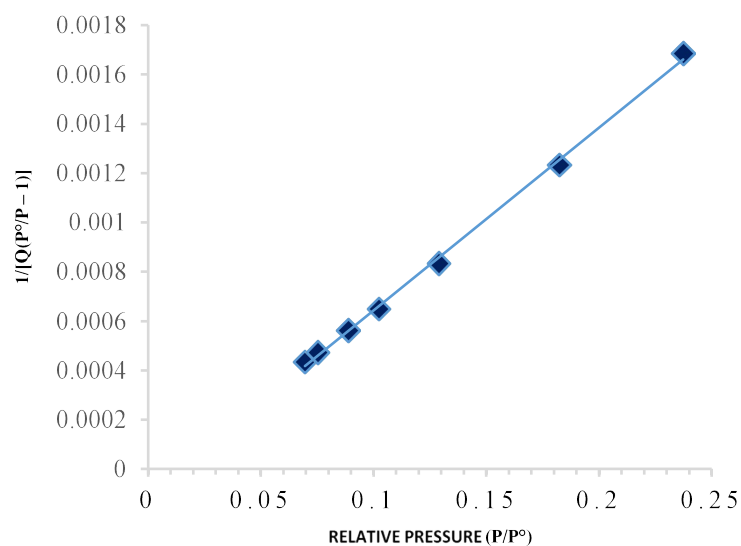

Fig. S1. Nitrogen physisorption measurements

## Optimization

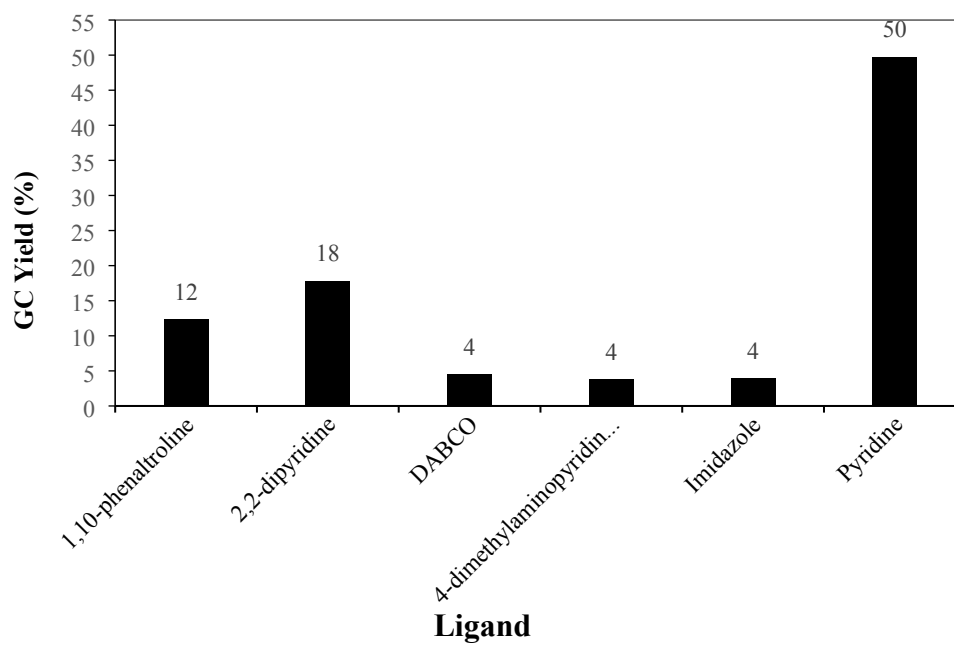

Fig. S2. Effect of ligand on reaction yield

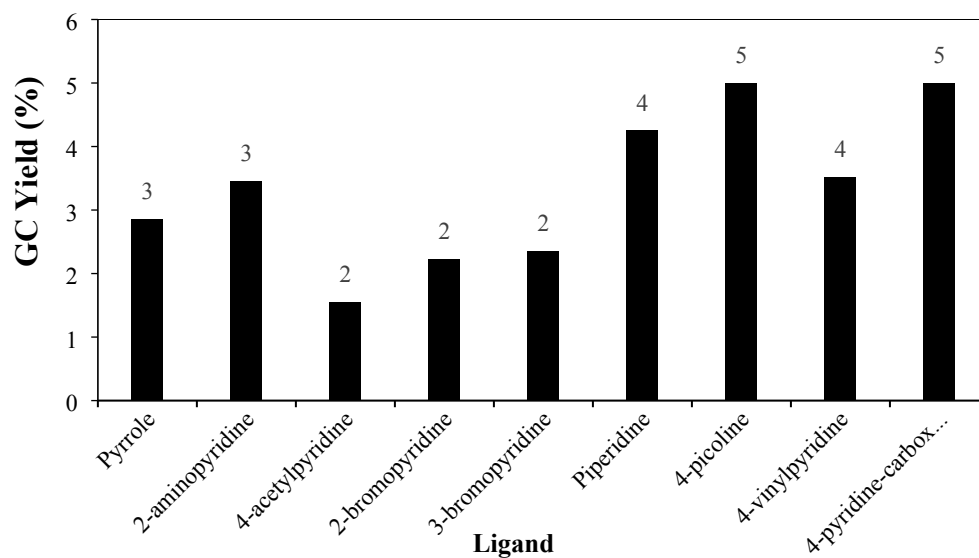

Fig. S3. Effect of mono-pyridines derivatives as ligand on reaction yield

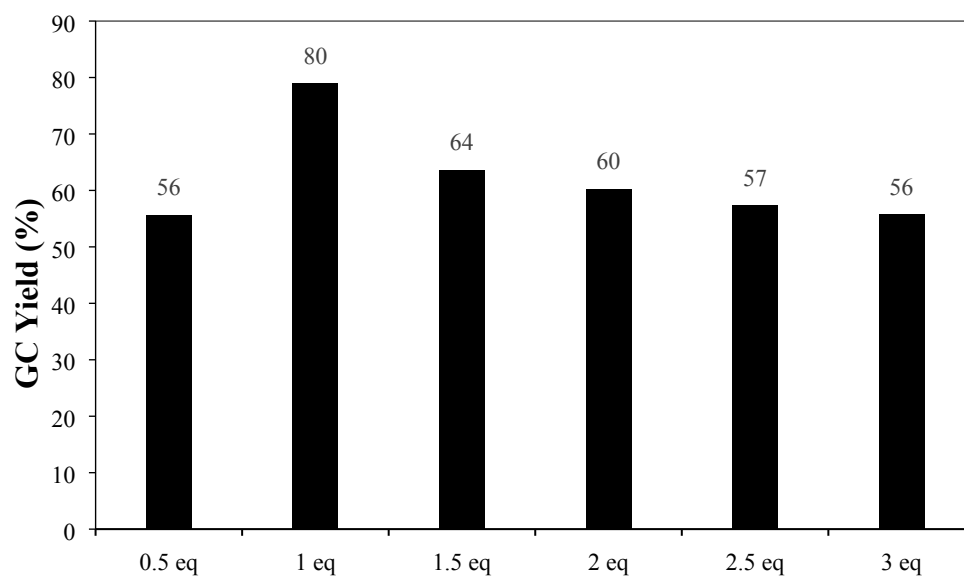

Fig. S4. Effect of base loadings (K<sub>2</sub>CO<sub>3</sub>) on reaction yield

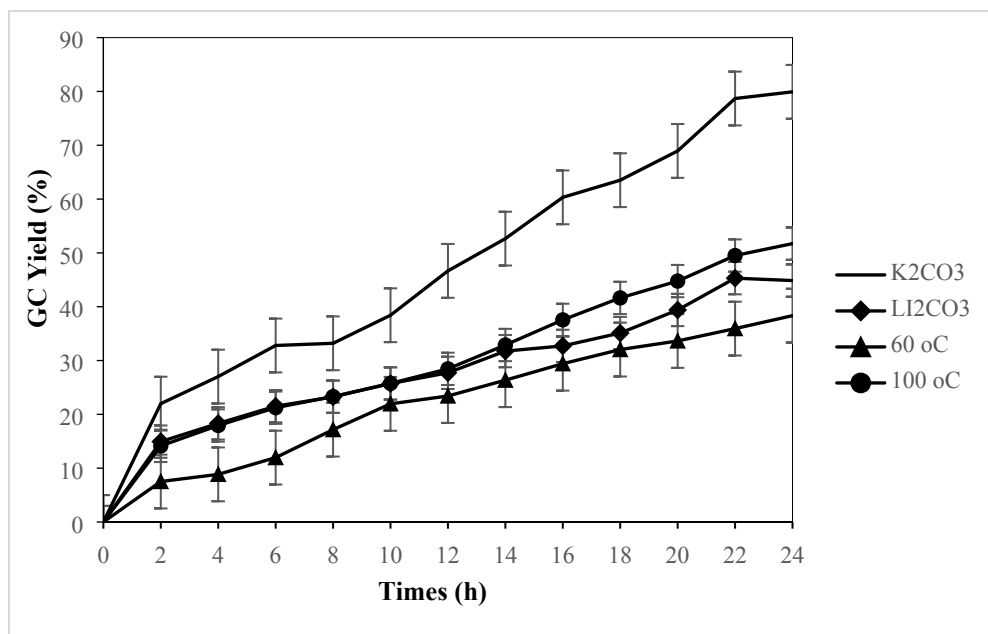

Fig. S5. Kinetic studies of reaction parameters

Table S2. Optimization for phenoxylation

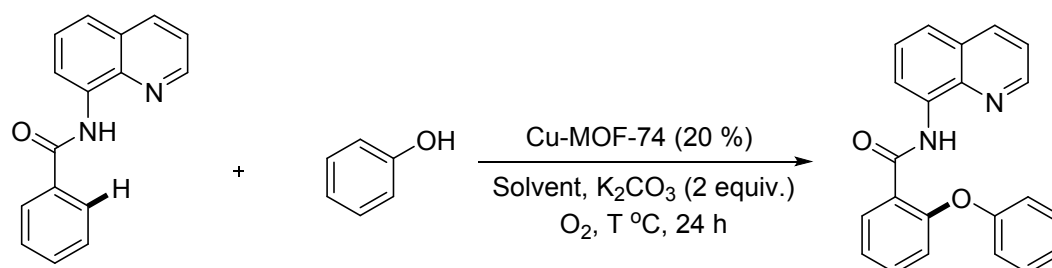

| Entry | Base                               | Ratio<br>C-H/phenol | Temperature<br>(°C) | Solvent    | Yield (%) <sup>b</sup> |
|-------|------------------------------------|---------------------|---------------------|------------|------------------------|
| 1     | K <sub>2</sub> CO <sub>3</sub>     | 1                   | 80                  | DMF        | 45                     |
| 2     | Li <sub>2</sub> CO <sub>3</sub>    | 1                   | 80                  | DMF        | 42 (leached)           |
| 3     | Cs <sub>2</sub> CO <sub>3</sub>    | 1                   | 80                  | DMF        | 22                     |
| 4     | K <sub>2</sub> CO <sub>3</sub>     | 0.5                 | 80                  | DMF        | 68                     |
| 5     | K <sub>2</sub> CO <sub>3</sub>     | 1.5                 | 80                  | DMF        | 36                     |
| 6     | K <sub>2</sub> CO <sub>3</sub>     | 0.5                 | 60                  | DMF        | 22                     |
| 7     | <b>K<sub>2</sub>CO<sub>3</sub></b> | <b>0.5</b>          | <b>100</b>          | <b>DMF</b> | <b>88</b>              |
| 8     | K <sub>2</sub> CO <sub>3</sub>     | 0.5                 | 120                 | DMF        | 91                     |
| 9     | K <sub>2</sub> CO <sub>3</sub>     | 0.5                 | 100                 | Pyridine   | <5                     |
| 10    | K <sub>2</sub> CO <sub>3</sub>     | 0.5                 | 100                 | NMP        | 77                     |

|                 |                                |     |     |         |    |
|-----------------|--------------------------------|-----|-----|---------|----|
| 11              | K <sub>2</sub> CO <sub>3</sub> | 0.5 | 100 | Dioxane | 35 |
| 12              | K <sub>2</sub> CO <sub>3</sub> | 0.5 | 100 | Toluene | <5 |
| 13 <sup>c</sup> | K <sub>2</sub> CO <sub>3</sub> | 0.5 | 100 | DMF     | 80 |
| 14 <sup>d</sup> | K <sub>2</sub> CO <sub>3</sub> | 0.5 | 100 | DMF     | 56 |
| 15 <sup>e</sup> | K <sub>2</sub> CO <sub>3</sub> | 0.5 | 100 | DMF     | 82 |

<sup>a</sup> 0.2 mmol scale, base (02 equiv.), 24 h, 2 mL volume of solvent. <sup>b</sup>GC yields. <sup>c</sup> reaction at 12 hours. <sup>d</sup>reaction with 1mL of solvent. <sup>e</sup>reaction with 3.0 mL of solvent. <sup>f</sup>reaction in 12 h..

### ***N*-(quinolin-8-yl)benzamide**

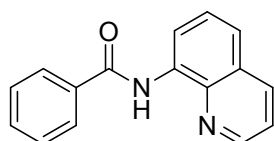

<sup>1</sup>H NMR (500 MHz, CDCl<sub>3</sub>, ppm):  $\delta_H$ 10.76 (s, 1H), 8.95 (dd,  $J$  = 7.5, 1.0 Hz, 1H), 8.86 (dd,  $J$  = 4.0, 1.5 Hz, 1H), 8.20 (dd,  $J$  = 8.5, 1.5 Hz, 1H), 8.10- 8.09 (m, 2H), 7.62- 7.54 (m, 5H), 7.49 (dd,  $J$  = 8.5, 4.0 Hz, 1H).

<sup>13</sup>C NMR (125 MHz, CDCl<sub>3</sub>, ppm):  $\delta_C$ 165.7 (C), 148.4 (CH), 138.9(C), 136.6 (CH), 135.3(C), 134.8 (C), 132.0(CH), 128.9(2 x CH), 128.2 (C), 127.7(CH), 127.5 (2 x CH), 121.8(2 x CH), 116.8(CH).

### **2-(Methoxy)-*N*-(quinolin-8-yl)benzamide**

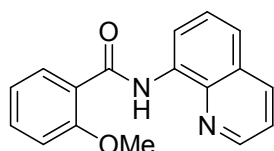

<sup>1</sup>H NMR (500 MHz, CDCl<sub>3</sub>, ppm):  $\delta_H$ 12.34 (s, 1H), 9.04 (d,  $J$  = 7.5 Hz, 1H), 8.88 (m, 1H), 8.36 (dd,  $J$  = 7.5, 1.5 Hz, 1H), 8.17 (m, 1H), 7.59 (t,  $J$  = 8.5 Hz, 1H), 7.51 (m, 2H), 7.46 (m, 1H), 7.15 (t,  $J$  = 7.5 Hz, 1H), 7.09 (dd,  $J$  = 8.0, 1.0 Hz, 1H), 4.21 (s, 3H).

<sup>13</sup>C NMR (125 MHz, CDCl<sub>3</sub>, ppm):  $\delta_C$ 163.8 (C), 157.9 (C), 148.4 (CH), 139.4 (C), 136.4 (CH), 135.9 (C), 133.3 (CH), 132.5 (CH), 128.3 (C), 127.7 (CH), 122.5 (C), 121.6 (CH), 121.6(CH), 121.4 (CH), 117.5 (CH), 111.8 (CH), 56.27(O-CH<sub>3</sub>).

### **2-(Ethoxy)-*N*-(quinolin-8-yl)benzamide**

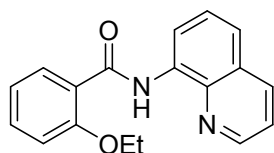

$^1\text{H}$  NMR (500 MHz,  $\text{CDCl}_3$ , ppm):  $\delta_H$ 12.08 (s, 1H), 9.09 (dd,  $J = 8.0, 1.5$  Hz, 1H), 8.83 (dd,  $J = 4.5, 1.5$  Hz, 1H), 8.36 (dd,  $J = 7.5, 1.5$  Hz, 1H), 8.17 (dd,  $J = 8.0, 1.5$  Hz, 1H), 7.59 (t,  $J = 8.0$  Hz, 1H), 7.49 (m, 3H), 7.12 (t,  $J = 7.5, 1.0$  Hz, 1H), 7.07 (t,  $J = 8.5$  Hz, 1H), 4.39 (q,  $J = 2.0$  Hz, 2H), 4.21 (t,  $J = 2.0$  Hz, 3H).

$^{13}\text{C}$  NMR (125 MHz,  $\text{CDCl}_3$ , ppm):  $\delta_C$ 164.0 (C), 157.2 (C), 147.8 (CH), 139.3 (C), 136.3 (CH), 135.9 (C), 133.1 (CH), 132.6 (CH), 128.1 (C), 127.6 (CH), 122.5 (C), 121.5 (CH), 121.4 (CH), 121.1 (CH), 117.8 (CH), 112.3 (CH), 65.2 (O- $\text{CH}_2$ ), 15.1 ( $\text{CH}_3$ ).

### 2-(Isopropoxy)-N-(quinolin-8-yl)benzamide

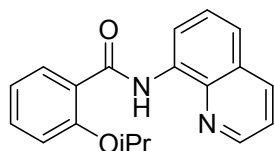

$^1\text{H}$  NMR (500 MHz,  $\text{CDCl}_3$ , ppm):  $\delta_H$ 12.05 (s, 1H), 9.11 (dd,  $J = 8.0, 1.0$  Hz, 1H), 8.85 (dd,  $J = 4.0, 1.5$  Hz, 1H), 8.35 (dd,  $J = 8.0, 1.5$  Hz, 1H), 8.17 (d,  $J = 8.5$  Hz, 1H), 7.60-7.45 (m, 4H), 7.10 (t,  $J = 7.5$  Hz, 2H), 4.93 (sept,  $J = 6.0$  Hz, 1H), 1.61 (d,  $J = 6.0$  Hz, 6H).

### 2-(nButoxy)-N-(quinolin-8-yl)benzamide

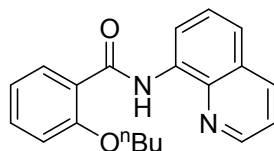

$^1\text{H}$  NMR (500 MHz,  $\text{CDCl}_3$ , ppm):  $\delta_H$ 12.04 (s, 1H), 9.13 (d,  $J = 8.0$  Hz, 1H), 8.89-8.86 (m, 1H), 8.38 (dd,  $J = 8.0, 2.0$  Hz, 1H), 8.23-8.18 (m, 1H), 7.63-7.54 (m, 4H), 7.15 (t,  $J = 7.5$  Hz, 1H), 7.12-7.09 (m, 1H), 4.35-4.31 (m, 2H), 2.22-2.16 (m, 2H), 1.57-1.52 (m, 2H), 0.95 (t,  $J = 7.5$  Hz, 3H).

### 2-(5'-Hexenoxy)-N-(quinolin-8-yl)benzamide



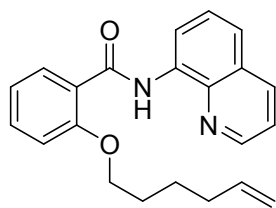

$^1\text{H}$  NMR (500 MHz,  $\text{CDCl}_3$ , ppm):  $\delta_H$  1.98 (s, 1H), 9.10 (dd,  $J = 7.5, 1.0$  Hz, 1H), 8.84-8.83 (m, 1H), 8.34 (dd,  $J = 8.0, 2.0$  Hz, 1H), 8.21- 8.18 (m, 1H), 7.49- 7.47 (m, 4H), 7.12 (t,  $J = 7.5$  Hz, 1H), 7.07 (dd,  $J = 8.0, 2.0$  Hz, 1H), 5.69 (ddt,  $J = 17.0, 10.0, 6.5$  Hz, 1H), 4.94- 4.87 (m, 2H), 4.31 (t,  $J = 7.0$  Hz, 2H), 2.18 (pent,  $J = 7.5$  Hz, 2H), 2.06 (q,  $J = 7.5$  Hz, 2H), 1.59 (pent,  $J = 7.5$  Hz, 2H).

### 2-(Hydroxyethoxy)-N-(quinolin-8-yl)benzamide

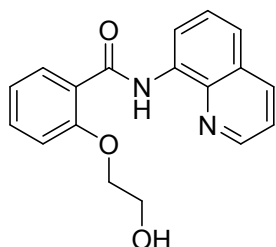

$^1\text{H}$  NMR (500 MHz,  $\text{CDCl}_3$ , ppm):  $\delta_H$  1.53 (s, 1H), 9.21 (d,  $J = 7.5$  Hz, 1H), 8.93- 8.92 (m, 1H), 8.40 (d,  $J = 8.0$  Hz, 1H), 8.25-8.23 (m, 1H), 7.64- 7.60 (m, 1H), 7.58- 7.55 (m, 1H), 7.53- 7.50 (m, 2H), 7.18- 7.14 (m, 1H), 7.08- 7.06 (m, 1H), 5.17 (br, 1H), 4.35- 4.34 (m, 2H), 4.24- 4.23 (m, 2H).

$^{13}\text{C}$  NMR (125 MHz,  $\text{CDCl}_3$ , ppm):  $\delta_C$  164.0 (C), 157.1 (C), 148.7 (CH), 138.9 (C), 137.8 (CH), 135.3 (C), 133.6 (CH), 133.1 (CH), 128.7 (C), 127.9 (CH), 122.3 (CH), 122.0 (C), 121.7 (CH), 121.6 (CH), 119.2 (CH), 112.1 (CH), 71.4 ( $\text{CH}_2$ ), 60.5 ( $\text{CH}_2$ ).

### 2-(Phenoxy)-N-(quinolin-8-yl)benzamide

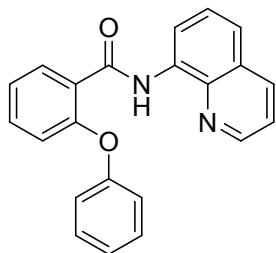

$^1\text{H}$  NMR (500 MHz,  $\text{CDCl}_3$ , ppm):  $\delta_H$  12.23 (s, 1H), 8.99 (dd,  $J = 8.0, 1.5$  Hz, 1H), 8.57 (dd,  $J = 4.0, 1.5$  Hz, 1H), 8.39 (dd,  $J = 8.0, 1.5$  Hz, 1H), 8.11 (dd,  $J = 8.5, 1.5$  Hz, 1H),

7.57 (t,  $J = 8.0$  Hz, 1H), 7.50(dd,  $J = 8.0, 1.0$  Hz, 1H), 7.46 (ddd,  $J = 8.5, 7.5, 2.0$  Hz, 1H), 7.41 (m, 2H), 7.37 (dd,  $J = 8.5, 4.0$  Hz, 1H), 7.27 (m, 3H), 7.19 (tt,  $J = 7.5, 1.0$  Hz, 1H), 7.03(dd,  $J = 8.5, 1.0$  Hz, 1H).

$^{13}\text{C}$  NMR (125 MHz,  $\text{CDCl}_3$ , ppm):  $\delta_{\text{C}}$  163.3 (C), 156.1 (C), 155.6 (C), 148.2 (CH), 139.3 (C), 136.2 (CH), 135.6 (C), 133.1 (CH), 132.5 (CH), 130.0 (2 x CH), 128.1 (C), 127.6 (CH), 125.1 (C), 124.4(CH), 123.8(CH), 121.7(CH), 121.6(CH), 119.8(2 x CH), 118.6 (CH), 117.3 (CH).

### 2-(4-Methylphenoxy)-*N*-(quinolin-8-yl)benzamide

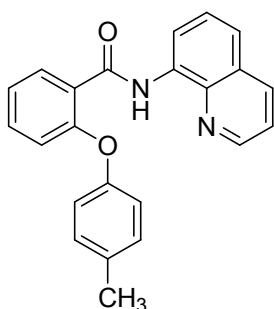

$^1\text{H}$  NMR (500 MHz,  $\text{CDCl}_3$ , ppm):  $\delta_{\text{H}}$  12.37 (s, 1H), 9.09 (d,  $J = 7.5$  Hz, 1H), 8.67 (d,  $J = 3.0$  Hz, 1H), 8.48 (dd,  $J = 8.0, 1.5$  Hz, 1H), 8.20 (d,  $J = 8.0$  Hz, 1H), 7.66 (t,  $J = 8.0$  Hz, 1H), 7.58 (d,  $J = 8.0$  Hz, 1H), 7.54- 7.51 (m, 1H), 7.46 (dd,  $J = 8.0, 4.0$  Hz, 1H), 7.34 (d,  $J = 5.0$  Hz, 1H), 7.32- 7.30 (m, 2H), 7.25 (d,  $J = 8.5$  Hz, 2H), 7.09 (d,  $J = 8.0$  Hz, 1H), 2.46 (s, 3H).

$^{13}\text{C}$  NMR (125 MHz,  $\text{CDCl}_3$ , ppm):  $\delta_{\text{C}}$  163.4 (C), 156.1 (C), 153.6 (C), 148.2 (CH), 139.3 (C), 136.2 (CH), 135.7 (C), 134.1 (C), 133.0 (CH), 132.5 (CH), 130.5 (2 x CH), 128.1 (C), 127.6 (CH), 124.7 (C), 123.4 (CH), 121.7 (CH), 121.6 (CH), 119.9 (2 x CH), 118.0 (CH), 117.3 (CH), 20.9 ( $\text{CH}_3$ ).

### 2-(2-Methylphenoxy)-*N*-(quinolin-8-yl)benzamide

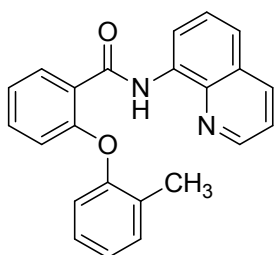

$^1\text{H}$  NMR (500 MHz,  $\text{CDCl}_3$ , ppm):  $\delta_H$ 12.27 (s, 1H), 9.03 (dd,  $J = 8.0, 1.5$  Hz, 1H), 8.46 (dd,  $J = 4.0, 1.5$  Hz, 1H), 8.39 (dd,  $J = 7.5, 1.5$  Hz, 1H), 8.11 (dd,  $J = 8.0, 1.5$  Hz, 1H), 7.58 (t,  $J = 8$  Hz, 1H), 7.50 (m, 1H), 7.39 (ddd,  $J = 8.0, 7.5, 1.5$  Hz, 1H), 7.34 (m, 2H), 7.24 (m, 2H), 7.18 (td,  $J = 7.5, 1.0$  Hz, 1H), 7.10 (dd,  $J = 8.0, 1.0$  Hz, 1H), 2.43 (s, 3H).

$^{13}\text{C}$  NMR (125 MHz,  $\text{CDCl}_3$ , ppm):  $\delta_C$  163.5 (C), 162.1 (C), 156.4 (C), 153.4 (C), 148.1 (CH), 139.3 (C), 136.2 (CH), 133.1 (CH), 132.5 (CH), 131.7 (CH), 130.8 (C), 128.1 (C), 127.6 (2 x CH), 125.2 (CH), 123.9 (C), 122.9 (CH), 121.7 (CH), 121.6 (CH), 120.9 (CH), 117.4 (CH), 116.4 (CH), 16.5 ( $\text{CH}_3$ ).

### 2-(3-Methylphenoxy)-*N*-(quinolin-8-yl)benzamide

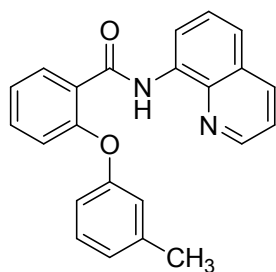

$^1\text{H}$  NMR (500 MHz,  $\text{CDCl}_3$ , ppm):  $\delta_H$ 12.42 (s, 1H), 9.18 (dd,  $J = 8.0, 1.0$  Hz, 1H), 8.76 (dd,  $J = 4.0, 1.5$  Hz, 1H), 8.57 (dd,  $J = 7.5, 1.5$  Hz, 1H), 8.29 (dd,  $J = 8.0, 1.5$  Hz, 1H), 7.80- 7.72 (m, 2H), 7.68- 7.62 (m, 2H), 7.55 (dd,  $J = 8.0, 4.0$  Hz, 1H), 7.49- 7.43 (m, 2H), 7.26- 7.25 (m, 1H), 7.22- 7.18 (m, 2H), 2.55 (s, 3H).

### 2-(2-Methoxyphenoxy)-*N*-(quinolin-8-yl)benzamide

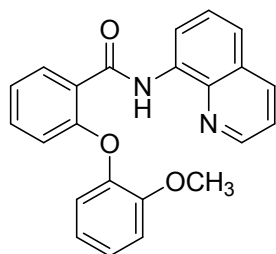

$^1\text{H}$  NMR (500 MHz,  $\text{CDCl}_3$ , ppm):  $\delta_H$ 12.27 (s, 1H), 9.01 (dd,  $J = 7.5, 1.0$  Hz, 1H), 8.42 (dd,  $J = 4.0, 1.5$  Hz, 1H), 8.33 (dd,  $J = 8.0, 2.0$  Hz, 1H), 8.10 (dd,  $J = 8.0, 1.5$  Hz, 1H), 7.58 (t,  $J = 8$  Hz, 1H), 7.49 (dd,  $J = 8.0, 1.0$  Hz, 1H), 7.37 (ddd,  $J = 8.0, 7.5, 1.5$  Hz, 1H), 7.32 (m, 2H), 7.26 (m, 1H), 7.19 (td,  $J = 7.5, 1.0$  Hz, 1H), 7.06 (m, 2H), 6.79 (dd,  $J = 8.5, 1.0$  Hz, 1H), 3.75 (s, 3H).

$^{13}\text{C}$  NMR (125 MHz,  $\text{CDCl}_3$ , ppm):  $\delta_{\text{C}}$  163.7 (C), 156.8 (C), 152.1 (C), 148.1 (CH), 143.8 (C), 139.4 (C), 136.1 (CH), 135.8 (C), 132.8 (CH), 132.2 (CH), 128.1 (C), 127.6 (CH), 126.2 (CH), 123.7 (C), 122.9 (CH), 122.7 (CH), 121.5 (2 x CH), 121.4 (CH), 117.3 (CH), 115.9 (CH), 114.3 (CH), 56.2 (O- $\text{CH}_3$ ).

**2-(4-Methoxyphenoxy)-*N*-(quinolin-8-yl)benzamide**

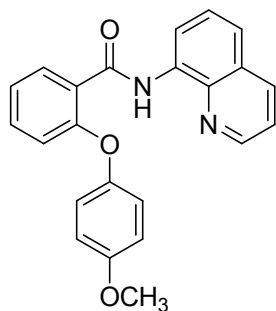

$^1\text{H}$  NMR (500 MHz,  $\text{CDCl}_3$ , ppm):  $\delta_{\text{H}}$  12.31 (s, 1H), 9.01 (d,  $J = 7.5$  Hz, 1H), 8.56 (d,  $J = 3.0$  Hz, 1H), 8.38 (d,  $J = 8.0$  Hz, 1H), 8.12 (d,  $J = 8.0$  Hz, 1H), 7.58 (t,  $J = 8.0$  Hz, 1H), 7.50 (d,  $J = 8.0$  Hz, 1H), 7.44- 7.41 (m, 1H), 7.37 (dd,  $J = 8.0, 4.0$  Hz, 1H), 7.25- 7.21 (m, 3H), 6.96 (dd,  $J = 9.0, 3.0$  Hz, 3H), 3.84 (s, 3H).

$^{13}\text{C}$  NMR (125 MHz,  $\text{CDCl}_3$ , ppm):  $\delta_{\text{C}}$  163.3 (C), 156.5 (CH), 148.9 (C), 148.1 (CH), 139.2 (C), 136.1 (CH), 135.6 (C), 132.9 (CH), 132.3 (CH), 128.0 (C), 127.5 (CH), 124.2 (C), 123.0 (CH), 121.5 (CH), 121.4 (CH), 121.3 (2 x CH), 117.2 (CH), 117.1 (CH), 115.0 (2 x CH), 55.7 (C).

**2-(4-Iodophenoxy)-*N*-(quinolin-8-yl)benzamide**

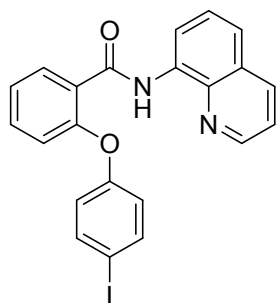

$^1\text{H}$  NMR (500 MHz,  $\text{CDCl}_3$ , ppm):  $\delta_{\text{H}}$  12.04 (s, 1H), 8.97 (dd,  $J = 7.5, 1.0$  Hz, 1H), 8.59 (dd,  $J = 4.0, 1.5$  Hz, 1H), 8.38 (dd,  $J = 8.0, 1.5$  Hz, 1H), 8.13 (dd,  $J = 8.0, 1.0$  Hz, 1H), 7.69 (m, 2H), 7.57 (t,  $J = 8.0$  Hz, 1H), 7.49 (m, 2H), 7.40 (dd,  $J = 8.0, 4.0$  Hz, 1H), 7.31 (m, 1H), 7.02 (m, 3H).

$^{13}\text{C}$  NMR (125 MHz,  $\text{CDCl}_3$ , ppm):  $\delta_{\text{C}}$ 163.0 (C), 156.3 (C), 154.7 (C), 148.2 (CH), 139.2 (C), 139.0(2 x CH), 136.3 (CH), 135.4(C), 133.2(CH), 132.7 (2 x CH), 128.1 (C), 127.6 (CH), 125.5 (C), 121.8(CH), 121.7(3 x CH), 118.9(CH), 117.3 (CH), 87.4 (C).

#### 2-(4-Nitrophenoxy)-*N*-(quinolin-8-yl)benzamide

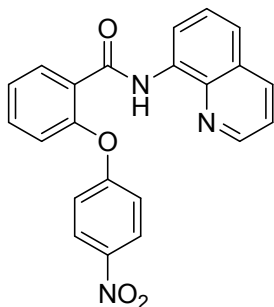

$^1\text{H}$  NMR (500 MHz,  $\text{CDCl}_3$ , ppm):  $\delta_{\text{H}}$ 11.67 (s, 1H), 8.93 (dd,  $J = 7.5, 1.0$  Hz, 1H), 8.66(d,  $J = 4.0$ Hz, 1H), 8.38 (dd,  $J = 7.5, 1.5$  Hz, 1H), 8.23(d,  $J = 8.0$  Hz, 2H), 8.15(d,  $J = 8.5$  Hz, 1H), 7.56 (m, 3H), 7.44 (m, 2H), 7.26 (m, 2H), 7.15(d,  $J = 8.0$  Hz, 1H).

$^{13}\text{C}$  NMR (125 MHz,  $\text{CDCl}_3$ , ppm):  $\delta_{\text{C}}$ 162.5 (C), 162.1 (C), 152.8 (C), 148.2 (CH), 143.6 (C), 139.0 (C), 136.5 (CH), 135.0 (C), 133.5(CH), 132.9 (CH), 128.2 (C), 127.6 (CH), 127.0 (C), 126.1 (CH), 126.0(2 x CH), 122.1(CH), 121.8 (CH), 120.9 (CH), 118.3(2 x CH), 117.4 (CH).

#### 4-Chloro-*N*-(quinolin-8-yl)benzamide

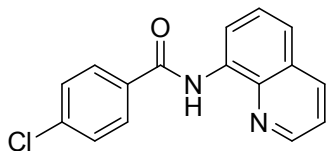

$^1\text{H}$  NMR (500 MHz,  $\text{CDCl}_3$ , ppm):  $\delta_{\text{H}}$ 10.72 (s, 1H), 8.90 (d,  $J = 7.0$  Hz, 1H), 8.85 (s,  $J = 1$ H), 8.20 (d,  $J = 7.5$  Hz, 1H), 8.03(d,  $J = 8.0$  Hz, 2H), 7.62- 7.51 (m, 5H).

$^{13}\text{C}$  NMR (125 MHz,  $\text{CDCl}_3$ , ppm):  $\delta_{\text{C}}$ 164.5 (C), 148.4 (CH), 138.8 (C), 138.3 (C), 136.7 (CH), 134.4 (C), 133.6 (C), 129.2 (2 x CH), 128.9 (2 x CH), 128.2 (C), 127.6 (CH), 122.1 (CH), 121.9 (CH), 116.9 (CH).

#### 4-Chloro-2-ethoxy-*N*-(quinolin-8-yl)benzamide

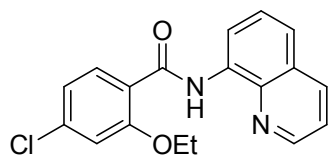

$^1\text{H}$  NMR (500 MHz,  $\text{CDCl}_3$ , ppm):  $\delta_H$  11.96 (s, 1H), 9.06 (d,  $J = 7.5$  Hz, 1H), 8.83- 8.81 (m, 1H), 8.29 (d,  $J = 8.5$  Hz, 1H), 8.17 (d,  $J = 8.5$  Hz, 1H), 7.59 (t,  $J = 8.0$  Hz, 1H), 7.53 (d,  $J = 8.0$  Hz, 1H), 7.46 (dd,  $J = 8.0, 4.0$  Hz, 1H), 7.10 (dd,  $J = 7.5, 2.0$  Hz, 1H), 7.06- 7.05 (m, 1H), 4.36 (q,  $J = 7.0$  Hz, 2H), 1.77 (t,  $J = 7.0$  Hz, 3H).

$^{13}\text{C}$  NMR (125 MHz,  $\text{CDCl}_3$ , ppm):  $\delta_C$  163.1 (C), 157.7 (C), 147.9 (CH), 139.4 (C), 138.9 (C), 136.4 (CH), 135.8 (C), 133.9 (CH), 128.2 (C), 127.7 (CH), 121.9 (CH), 121.6 (CH), 121.5 (CH), 121.2 (C), 117.9 (CH), 113.0 (CH).

#### 4-Methoxy-*N*-(quinolin-8-yl)benzamide

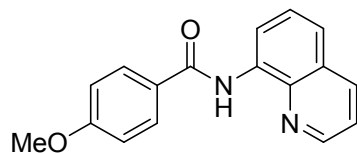

$^1\text{H}$  NMR (500 MHz,  $\text{CDCl}_3$ , ppm):  $\delta_H$  10.73 (s, 1H), 8.93- 8.92 (m, 2H), 8.46- 8.41 (m, 1H), 8.19- 8.18 (m, 2H), 8.74- 8.67 (m, 3H), 7.04 (d,  $J = 8.0$  Hz, 2H), 3.90 (s, 3H).

$^{13}\text{C}$  NMR (125 MHz,  $\text{CDCl}_3$ , ppm):  $\delta_C$  162.9 (C), 130.1 (CH), 128.9 (C), 122.5 (C), 121.4 (C), 114.0 (2 x CH), 55.6 ( $\text{CH}_3$ ).

#### 2-Ethoxy-4-methoxy-*N*-(quinolin-8-yl)benzamide

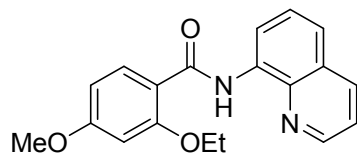

$^1\text{H}$  NMR (500 MHz,  $\text{CDCl}_3$ , ppm):  $\delta_H$  11.97 (s, 1H), 9.09 (d,  $J = 7.5$  Hz, 1H), 8.82 (dd,  $J = 4.0, 1.0$  Hz, 1H), 8.34 (d,  $J = 9.0$  Hz, 1H), 8.17 (dd,  $J = 8.5, 1.5$  Hz, 1H), 7.58 (t,  $J = 8.0$  Hz, 1H), 7.51 (d,  $J = 8.0$  Hz, 1H), 7.45 (dd,  $J = 8.5, 4.5$  Hz, 1H), 6.66 (dd,  $J = 8.5, 2.0$  Hz, 1H), 6.58 (d,  $J = 2.5$  Hz, 1H), 4.35 (q,  $J = 7.0$  Hz, 2H), 3.88 (s, 3H), 1.78 (t,  $J = 7.0$  Hz, 3H).

$^{13}\text{C}$  NMR (125 MHz,  $\text{CDCl}_3$ , ppm):  $\delta_C$  164.0 (C), 163.8 (C), 158.7 (C), 147.8 (CH), 139.4 (C), 136.4 (CH), 136.3 (CH), 134.4 (CH), 128.3 (C), 127.8 (C), 127.7 (CH), 121.5 (CH),

121.4 (CH), 117.8 (CH), 115.7 (C), 105.5 (CH), 99.5 (CH), 65.4 (CH<sub>2</sub>), 55.7 (CH<sub>3</sub>), 15.2 (CH<sub>3</sub>).

### 2-Methyl-*N*-(quinolin-8-yl)benzamide

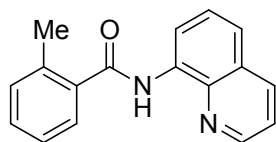

<sup>1</sup>H NMR (500 MHz, CDCl<sub>3</sub>, ppm):  $\delta_H$  10.21 (s, 1H), 8.94 (d,  $J$  = 7.5 Hz, 1H), 8.78 (dd,  $J$  = 4.0, 1.5 Hz, 1H), 8.19 (dd,  $J$  = 8.5, 1.0 Hz, 1H), 7.69 (d,  $J$  = 7.5 Hz, 1H), 7.61 (t,  $J$  = 8.0 Hz, 1H), 7.55 (d,  $J$  = 8.0 Hz, 1H), 7.46 (d,  $J$  = 8.0, 4.0 Hz, 1H), 7.41 (t,  $J$  = 7.5 Hz, 1H), 7.33 (t,  $J$  = 8.0 Hz, 2H), 2.61 (s, 3H).

<sup>13</sup>C NMR (125 MHz, CDCl<sub>3</sub>, ppm):  $\delta_C$  168.4 (C), 148.4 (CH), 138.8 (C), 136.8 (C), 136.8 (C), 136.5 (CH), 134.9 (C), 131.5 (CH), 130.5 (CH), 128.2 (C), 127.6 (CH), 127.4 (CH), 126.2 (CH), 121.9 (CH), 121.8 (CH), 116.7 (CH).

### 2-Ethoxy-4-methyl-*N*-(quinolin-8-yl)benzamide

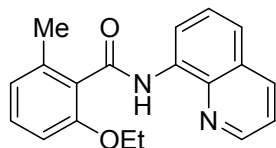

<sup>1</sup>H NMR (500 MHz, CDCl<sub>3</sub>, ppm):  $\delta_H$  10.21 (s, 1H), 9.01 (d,  $J$  = 7.5 Hz, 1H), 8.76 (dd,  $J$  = 4.0, 1.0 Hz, 1H), 8.17 (d,  $J$  = 8.0 Hz, 1H), 7.60 (t,  $J$  = 8.0 Hz, 1H), 7.54 (d,  $J$  = 8.5 Hz, 1H), 7.44 (dd,  $J$  = 8.5, 4.0 Hz, 1H), 7.27 (t,  $J$  = 8.0 Hz, 1H), 6.88 (d,  $J$  = 8.0 Hz, 1H), 6.84 (d,  $J$  = 8.0 Hz, 1H), 4.11 (q,  $J$  = 7.0 Hz, 2H), 2.47 (s, 3H), 1.31 (t,  $J$  = 7.0 Hz, 3H).

### 3-Bromo-*N*-(quinolin-8-yl)benzamide

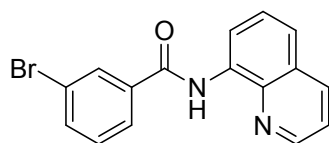

### 3-Bromo-2-ethoxy-*N*-(quinolin-8-yl)benzamide

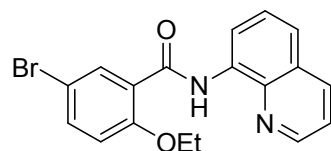

$^1\text{H}$  NMR (500 MHz,  $\text{CDCl}_3$ , ppm):  $\delta_H$  10.01 (s, 1H), 9.06 (dd,  $J = 7.5, 1.0$  Hz, 1H), 8.83 (dd,  $J = 4.0, 1.5$  Hz, 1H), 8.47 (d,  $J = 3.0$  Hz, 1H), 8.18 (dd,  $J = 8.0, 1.5$  Hz, 1H), 7.61-7.54 (m, 3H), 7.47 (dd,  $J = 8.0, 4.0$  Hz, 1H), 6.96 (d,  $J = 8.5$  Hz, 1H), 4.37 (q,  $J = 7.0$  Hz, 2H), 1.75 (t,  $J = 7.0$  Hz, 3H).

$^{13}\text{C}$  NMR (125 MHz,  $\text{CDCl}_3$ , ppm):  $\delta_C$  162.6 (C), 156.3 (C), 150.0 (CH), 139.4 (C), 136.4 (CH), 135.7 (CH), 135.4 (CH), 128.3 (C), 127.7 (CH), 124.4 (C), 122.0 (CH), 121.6 (CH), 118.0 (CH), 114.4 (CH), 113.8 (C).



# *N*-(quinolin-8-yl)benzamide

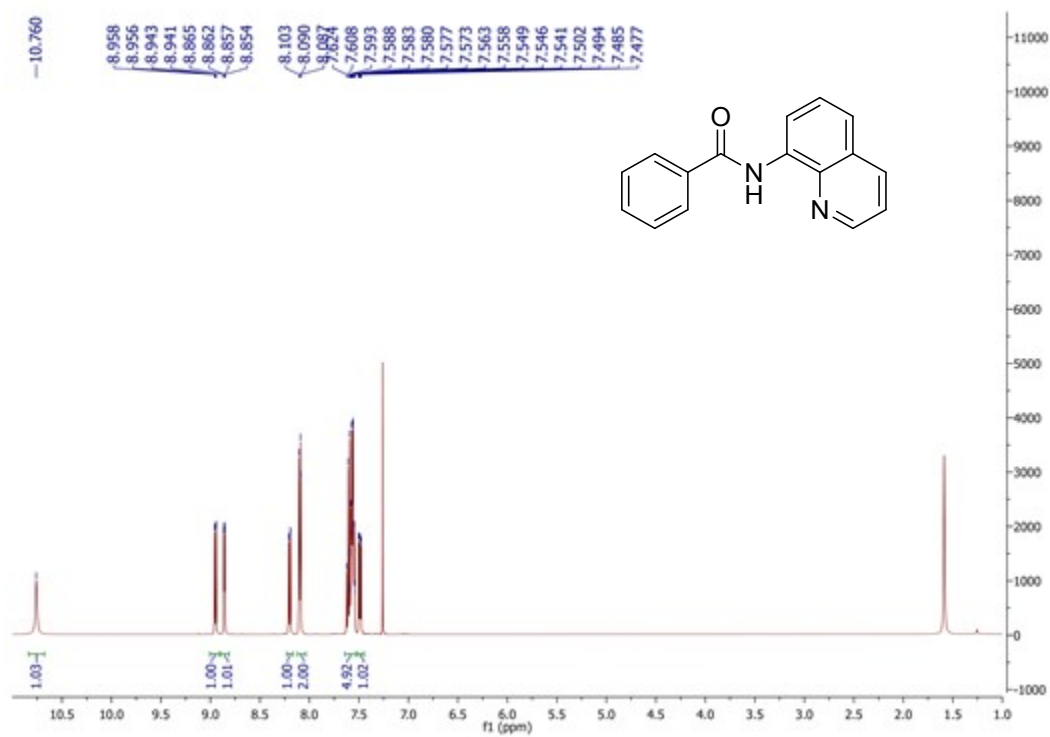

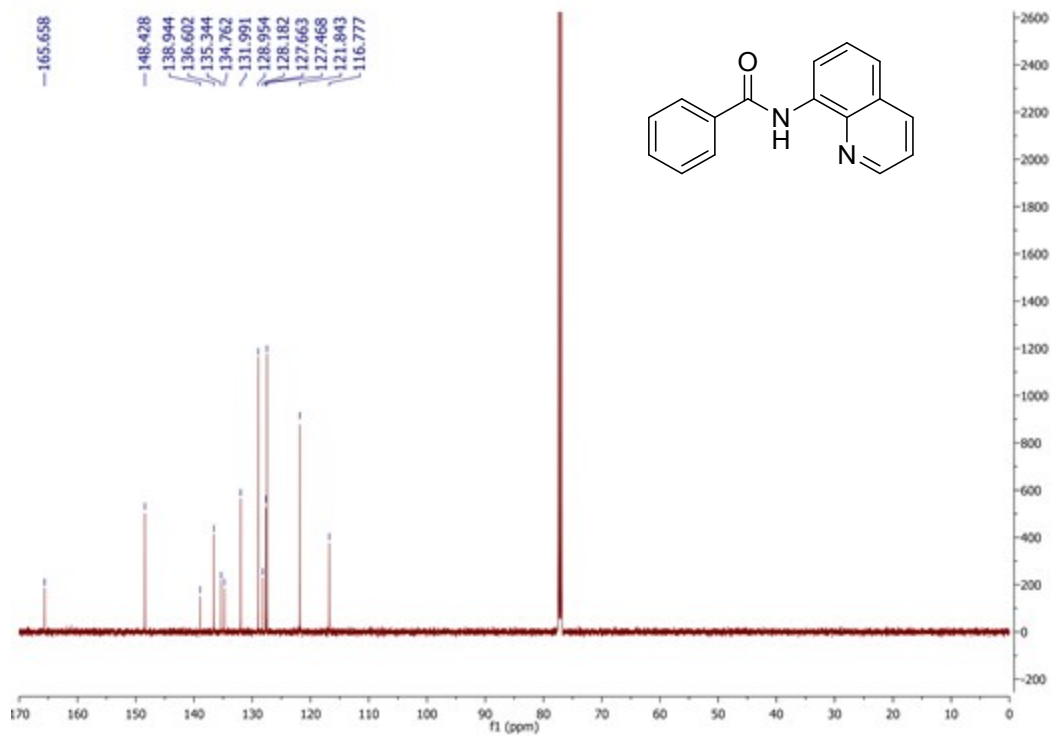

## 2-(Methoxy)-*N*-(quinolin-8-yl)benzamide

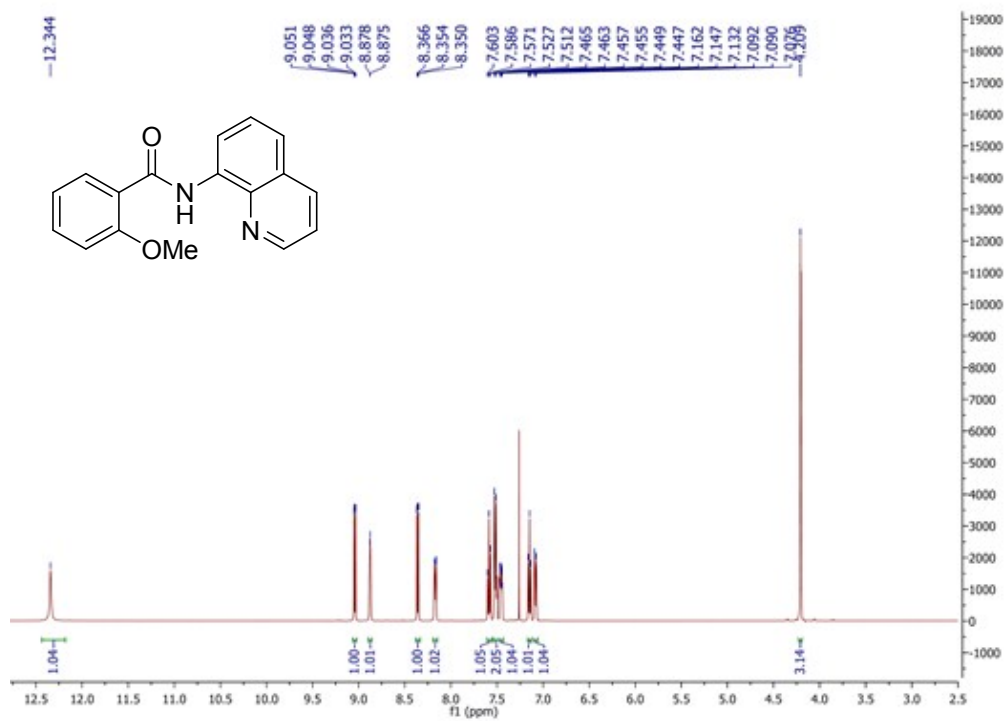

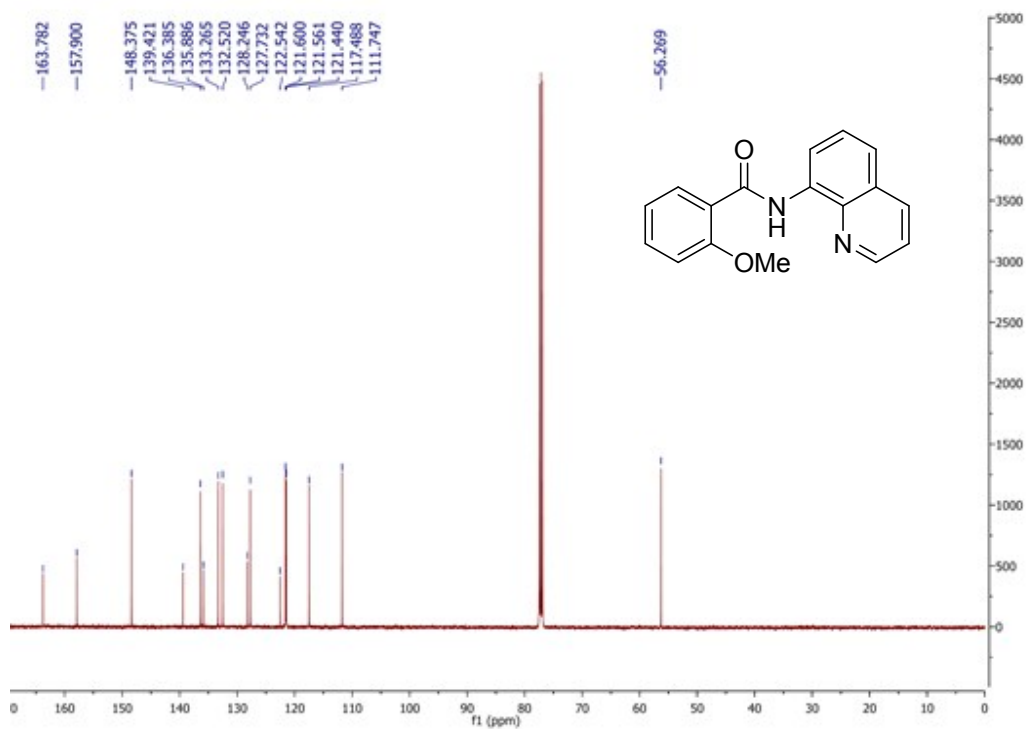

## 2-(Ethoxy)-N-(quinolin-8-yl)benzamide

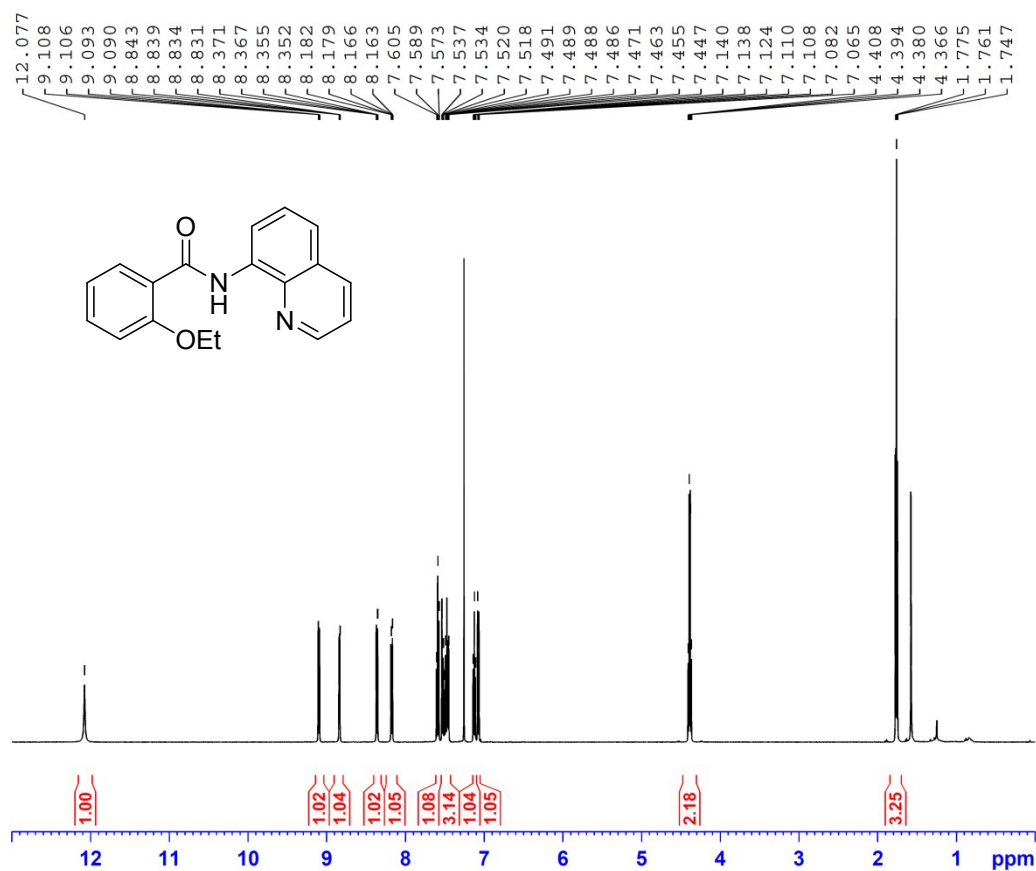

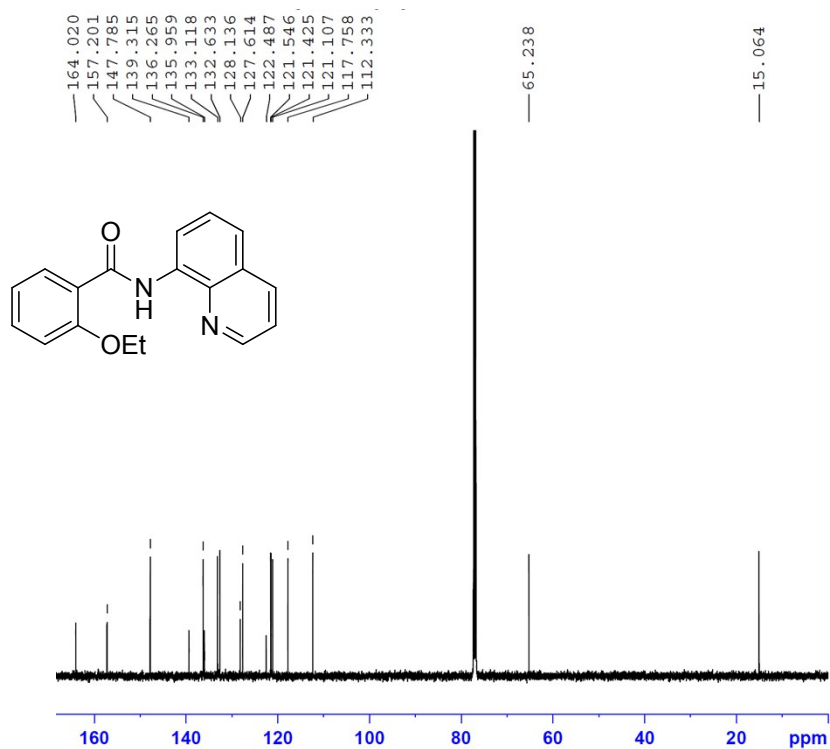

## 2-(Isopropoxy)-*N*-(quinolin-8-yl)benzamide

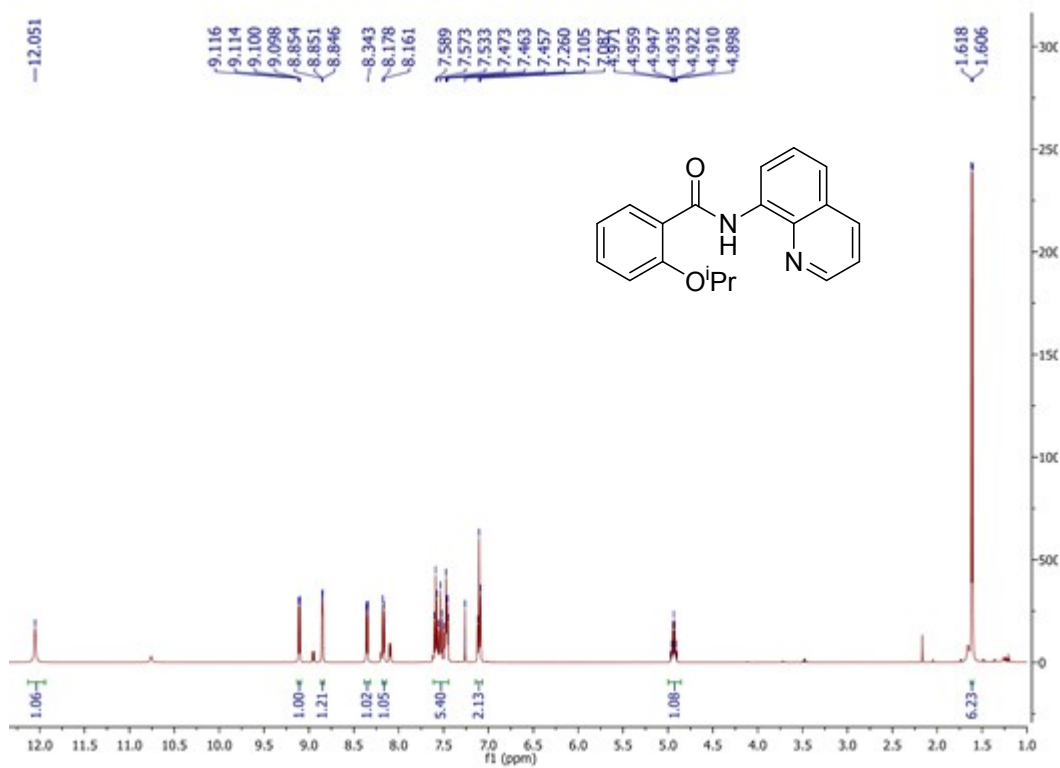

## 2-(nButoxy)-*N*-(quinolin-8-yl)benzamide

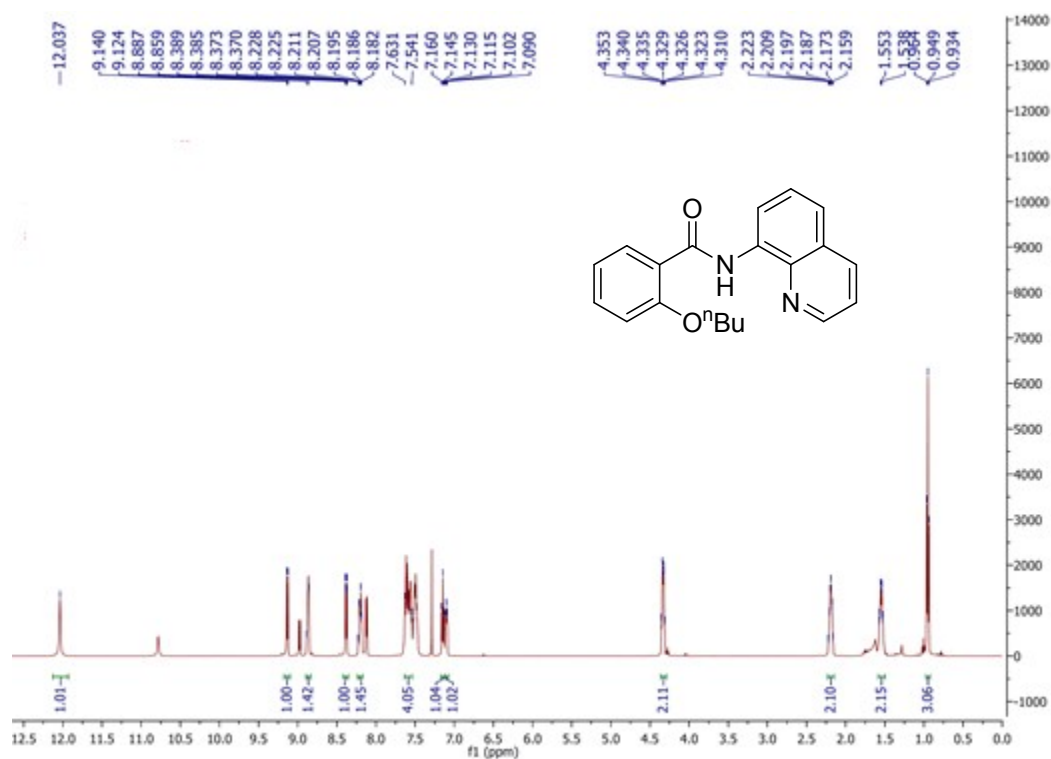

## 2-(5'-Hexenoxy)-N-(quinolin-8-yl)benzamide

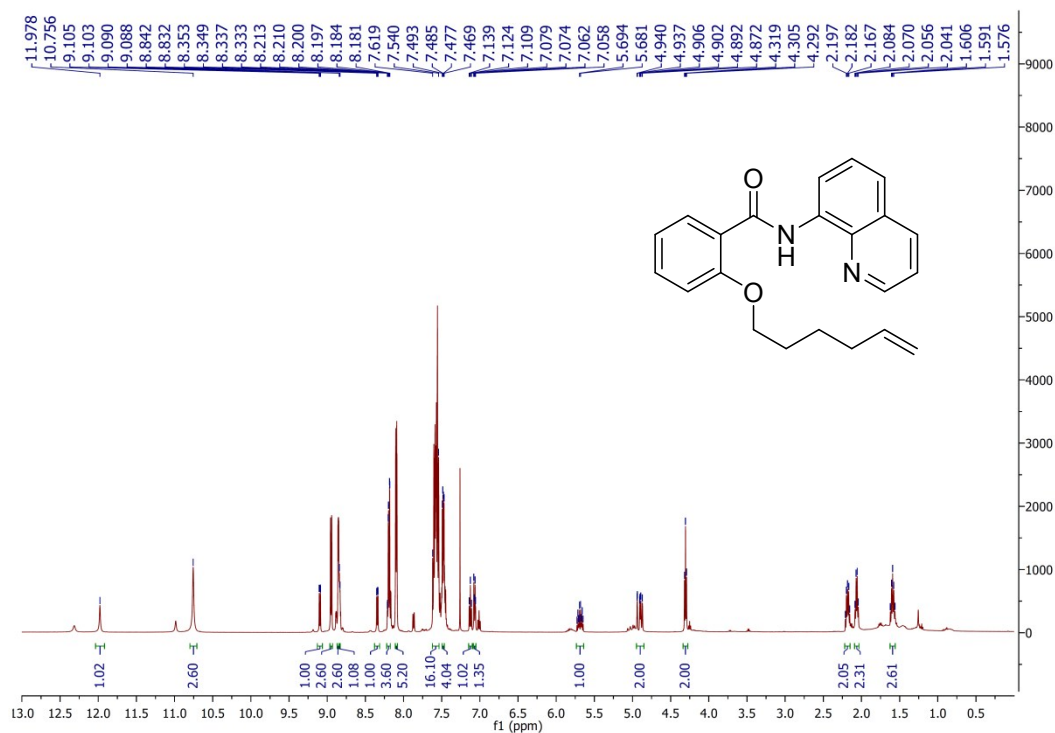

## 2-(Hydroxyethoxy)-N-(quinolin-8-yl)benzamide

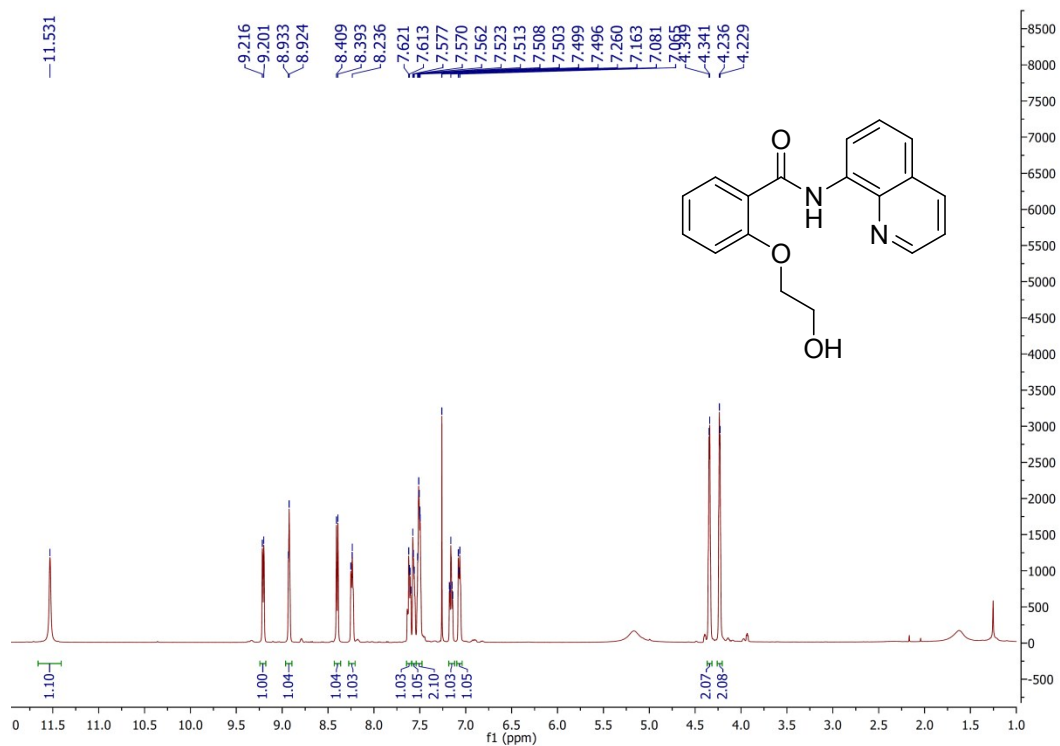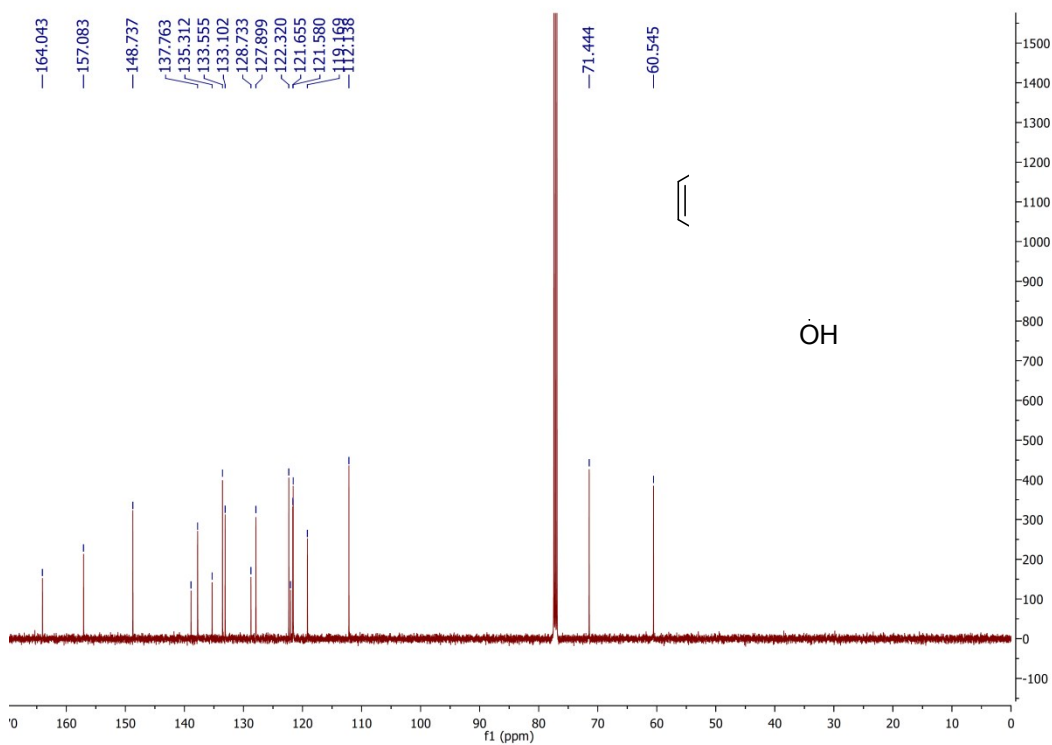

**2-(Phenoxy)-N-(quinolin-8-yl)benzamide**

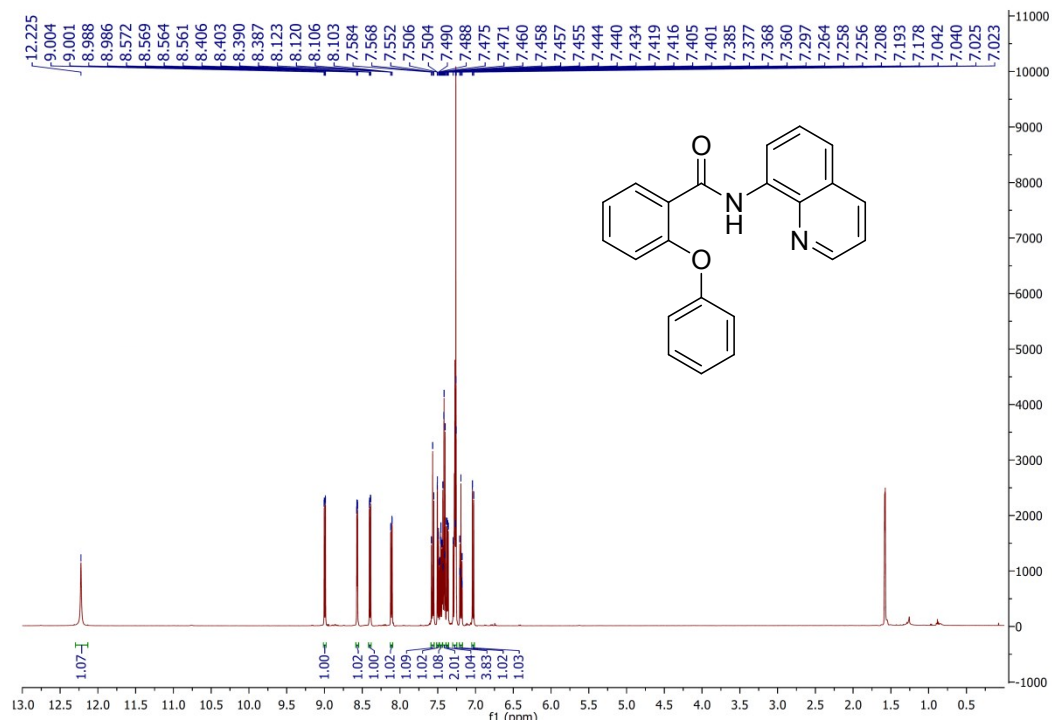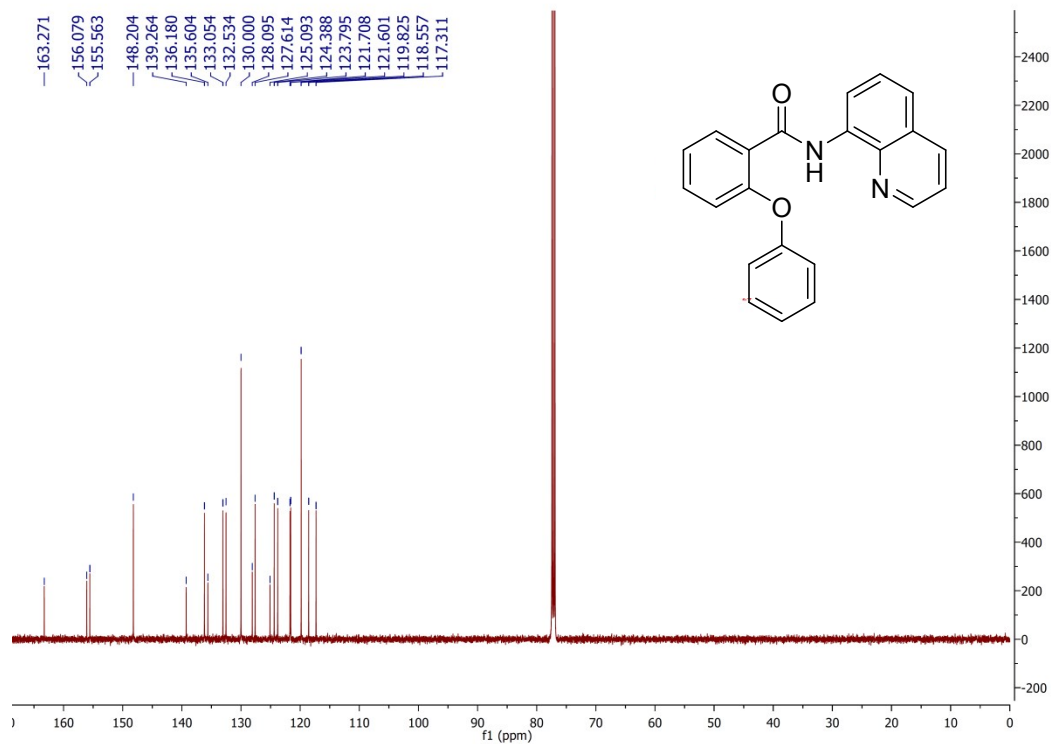

**2-(4-Methylphenoxy)-*N*-(quinolin-8-yl)benzamide**

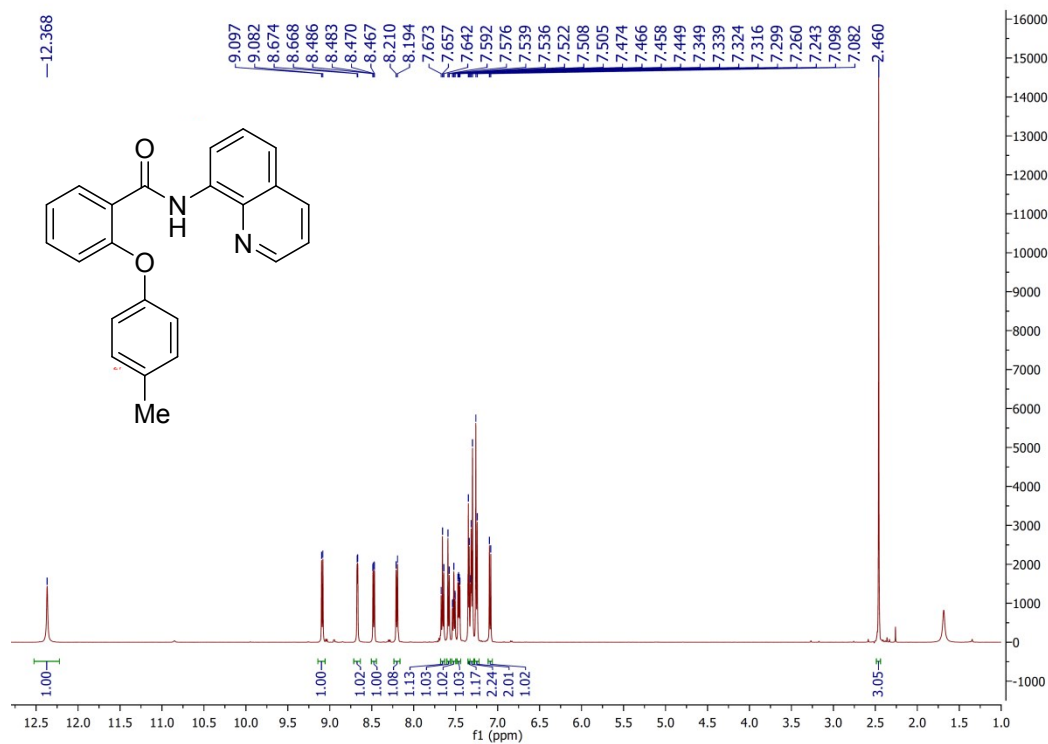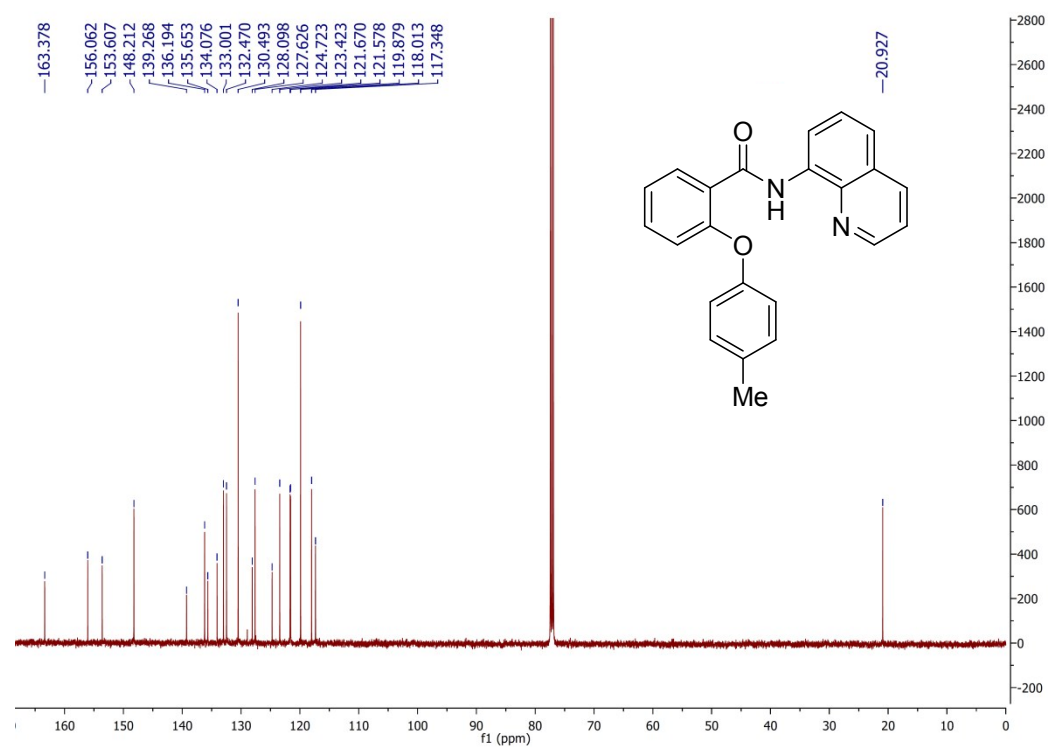

**2-(2-Methylphenoxy)-N-(quinolin-8-yl)benzamide**



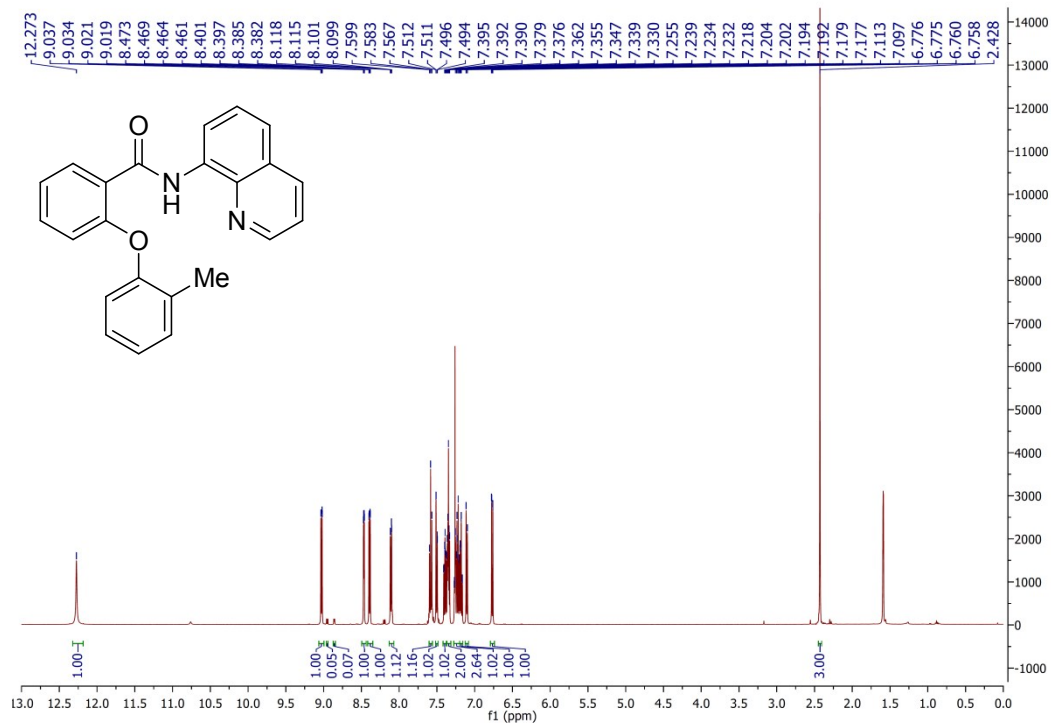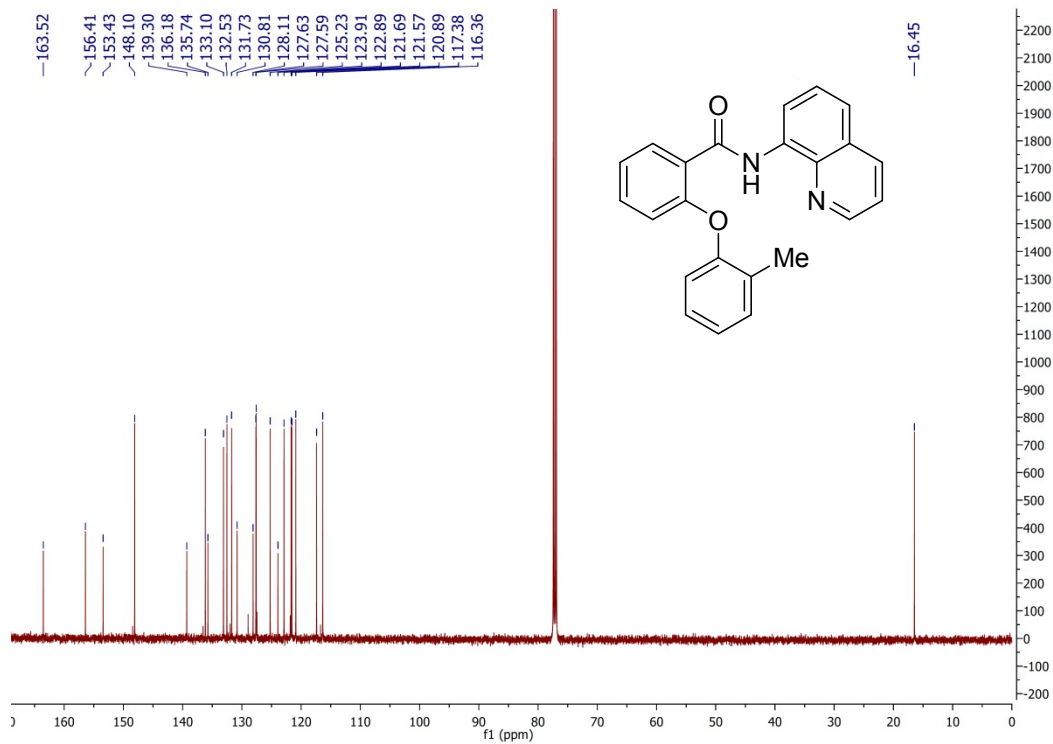

**2-(3-Methoxyphenyl)-N-(quinolin-8-yl)benzamide**

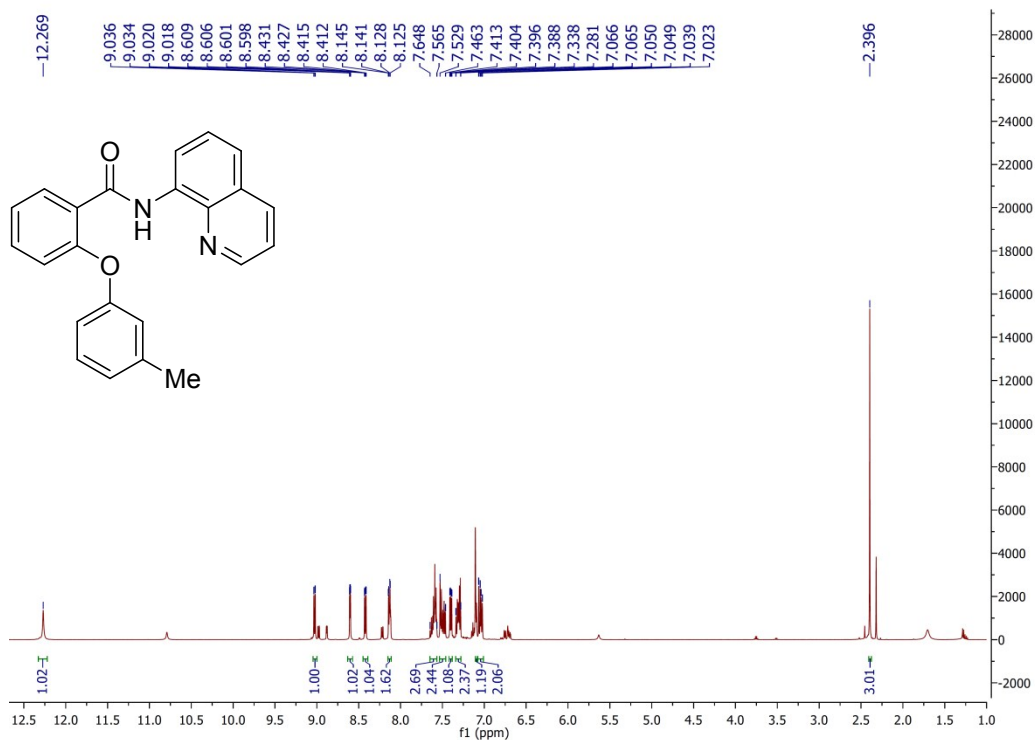

## 2-(2-Methoxyphenoxy)-N-(quinolin-8-yl)benzamide

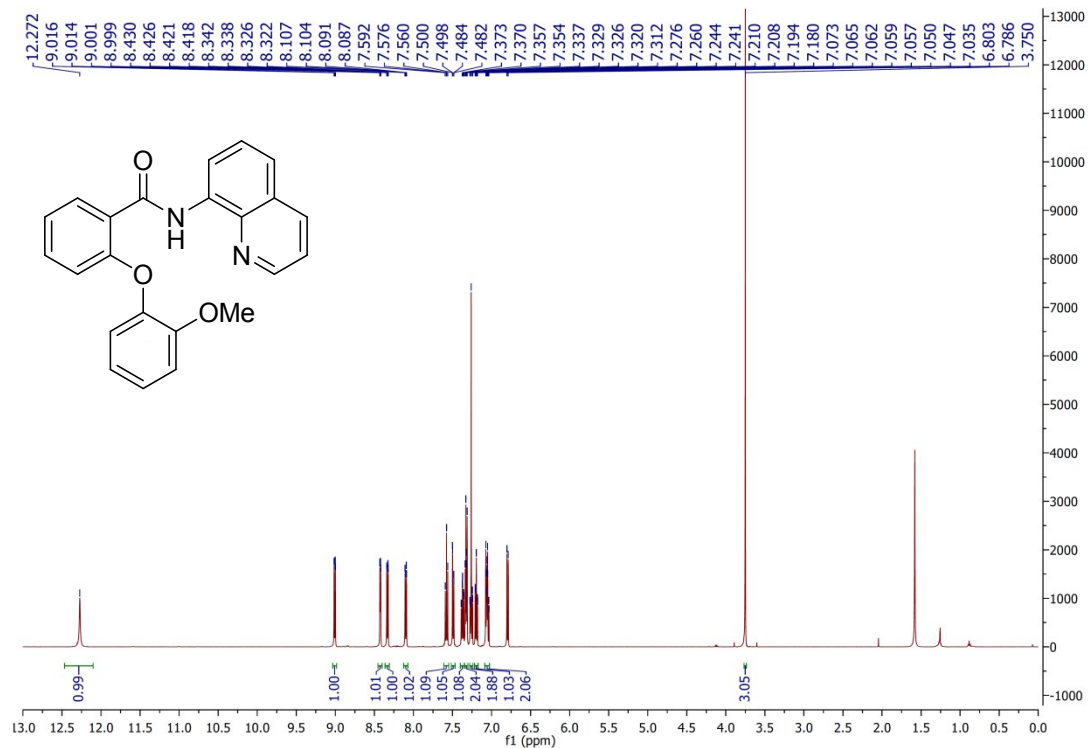

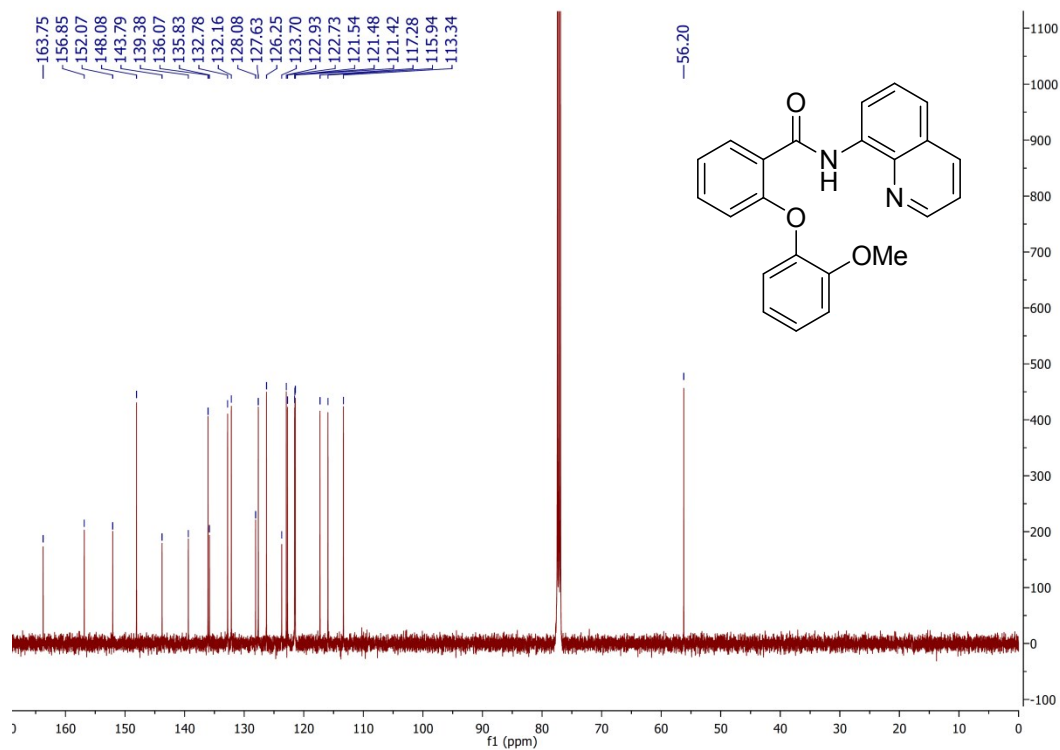

## 2-(4-Methoxyphenoxy)-N-(quinolin-8-yl)benzamide

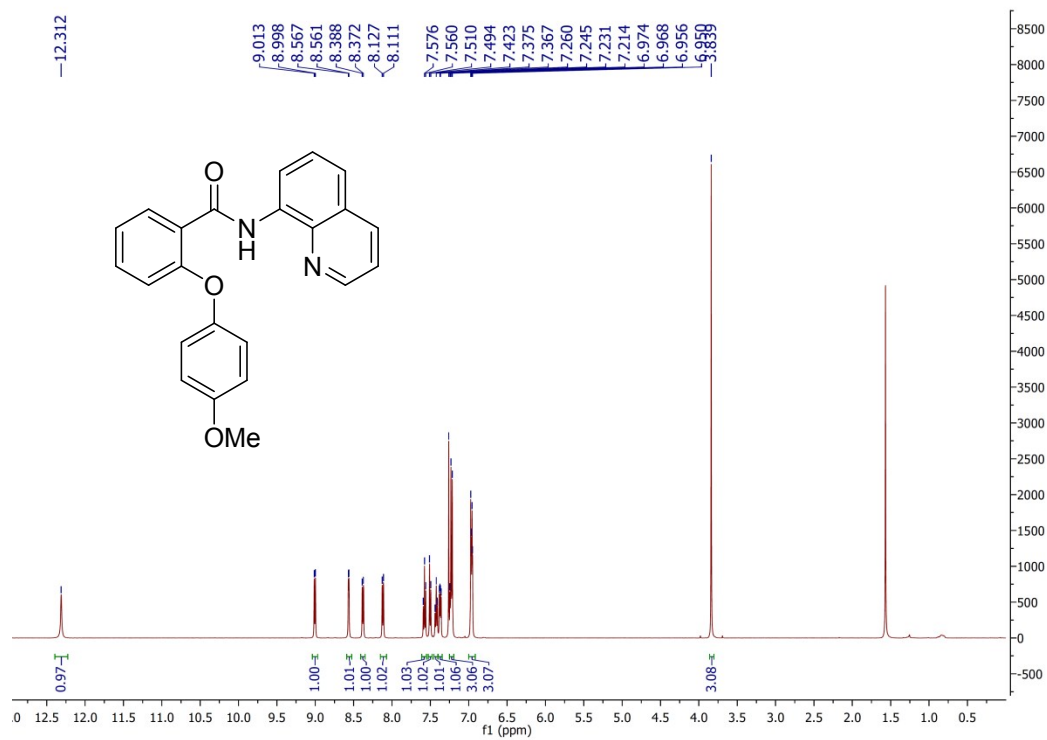



## 2-(4-Iodophenoxy)-N-(quinolin-8-yl)benzamide

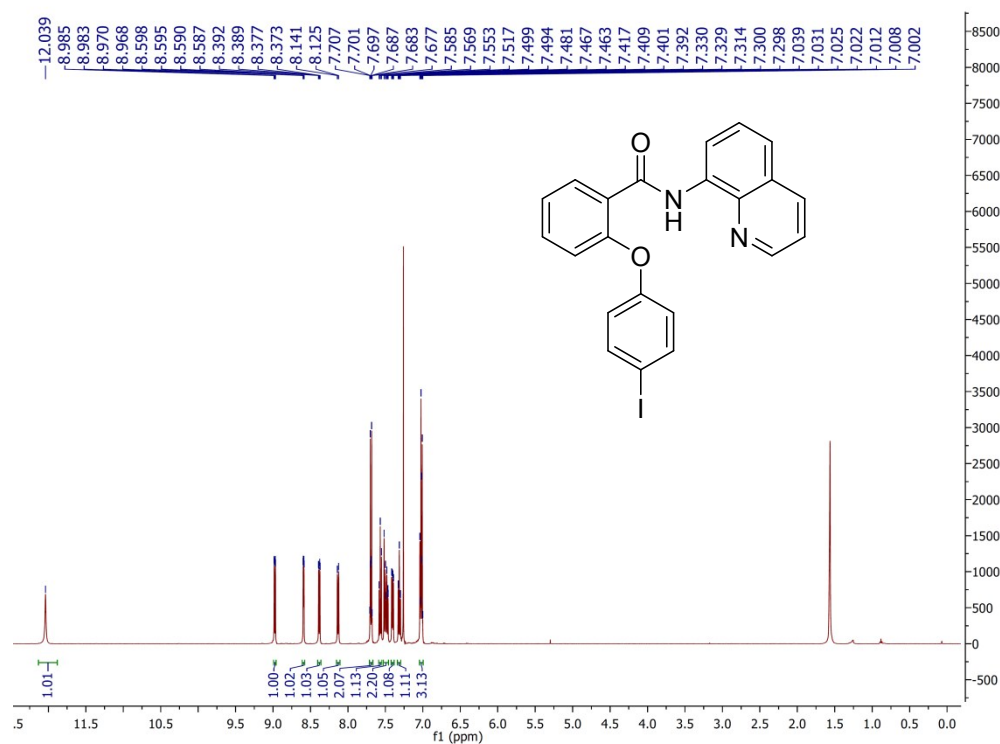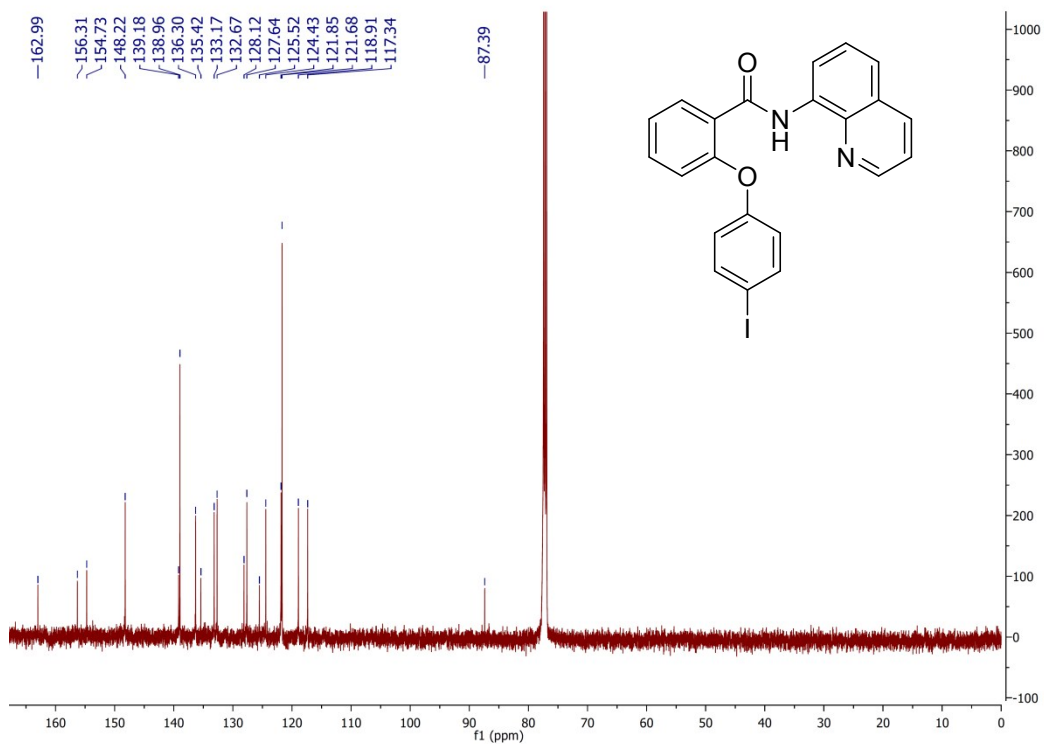

## 2-(4-Nitrophenoxy)-*N*-(quinolin-8-yl)benzamide

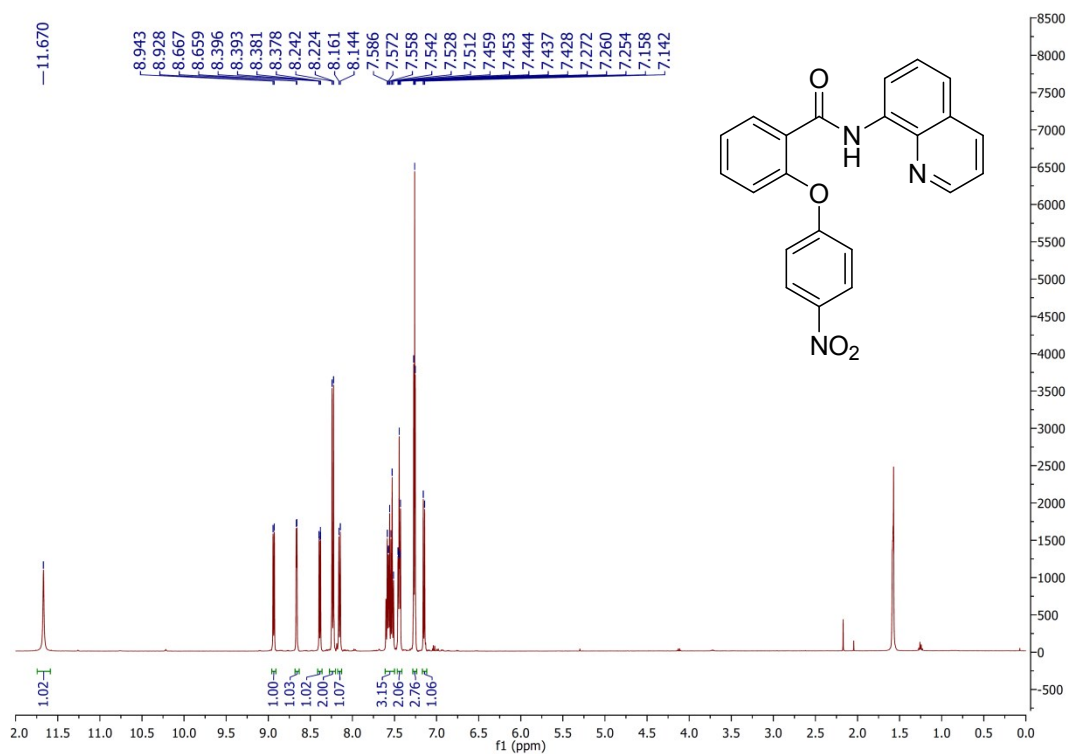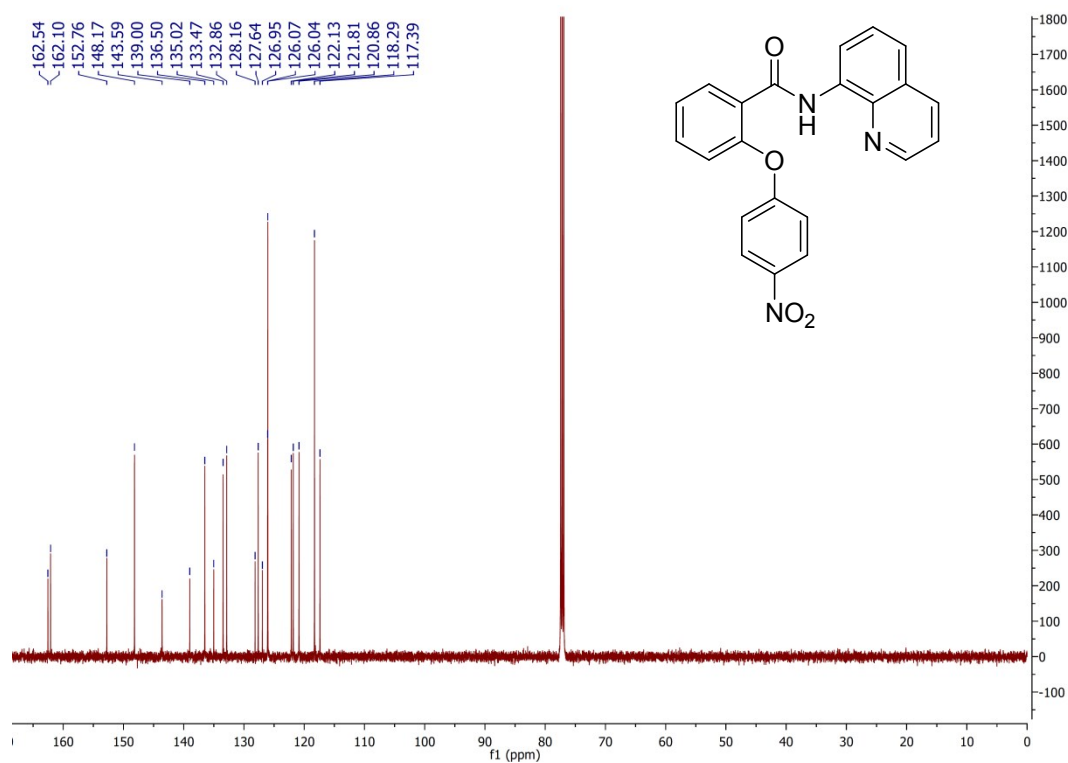

# 4-Chloro-N-(quinolin-8-yl)benzamide

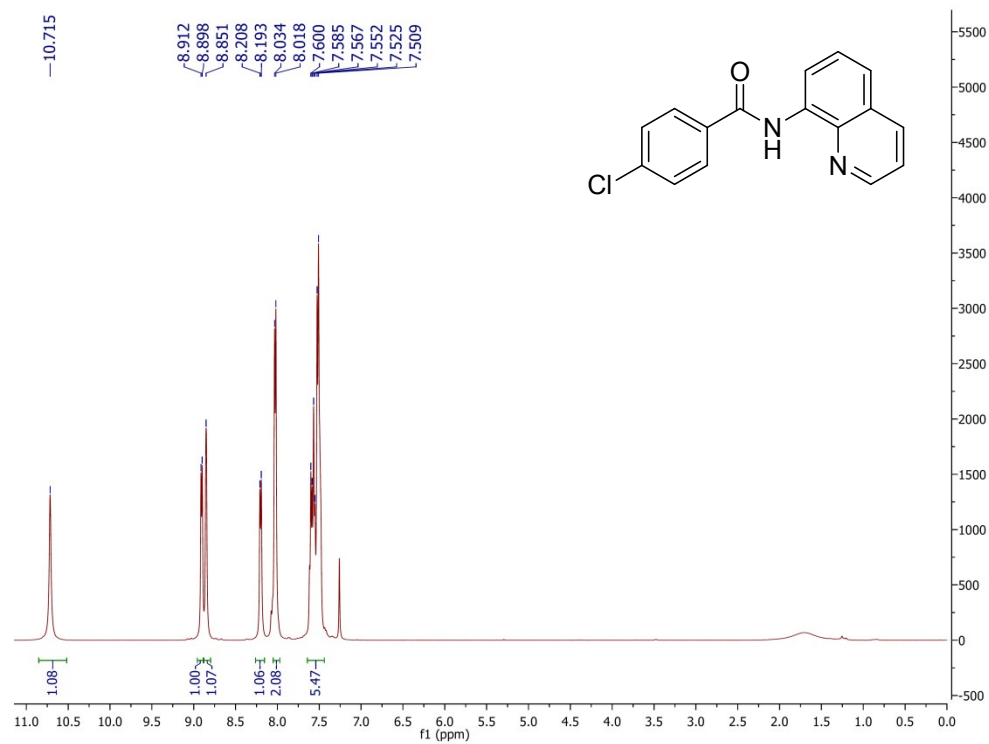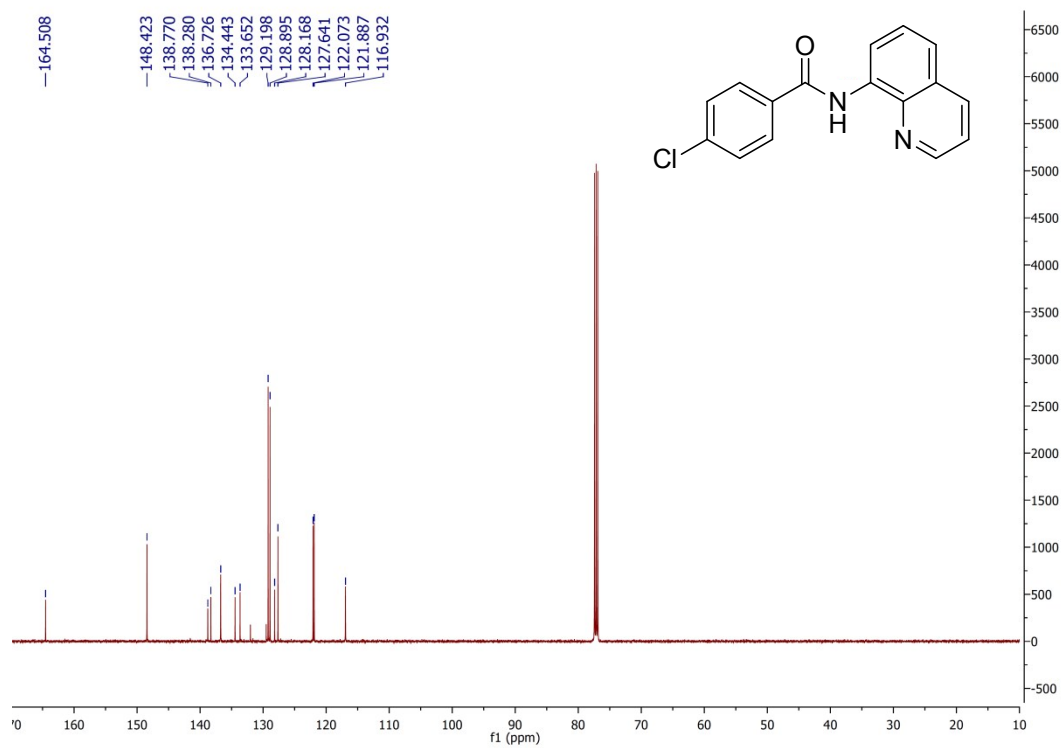

# 4-Chloro-2-ethoxy-N-(quinolin-8-yl)benzamide

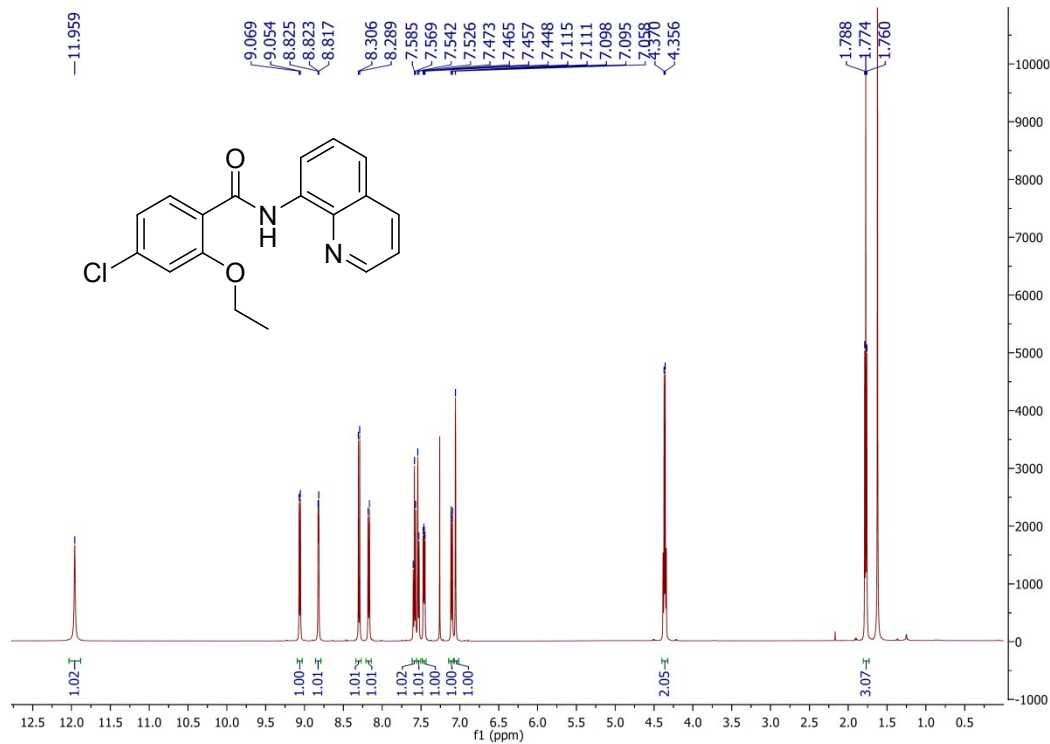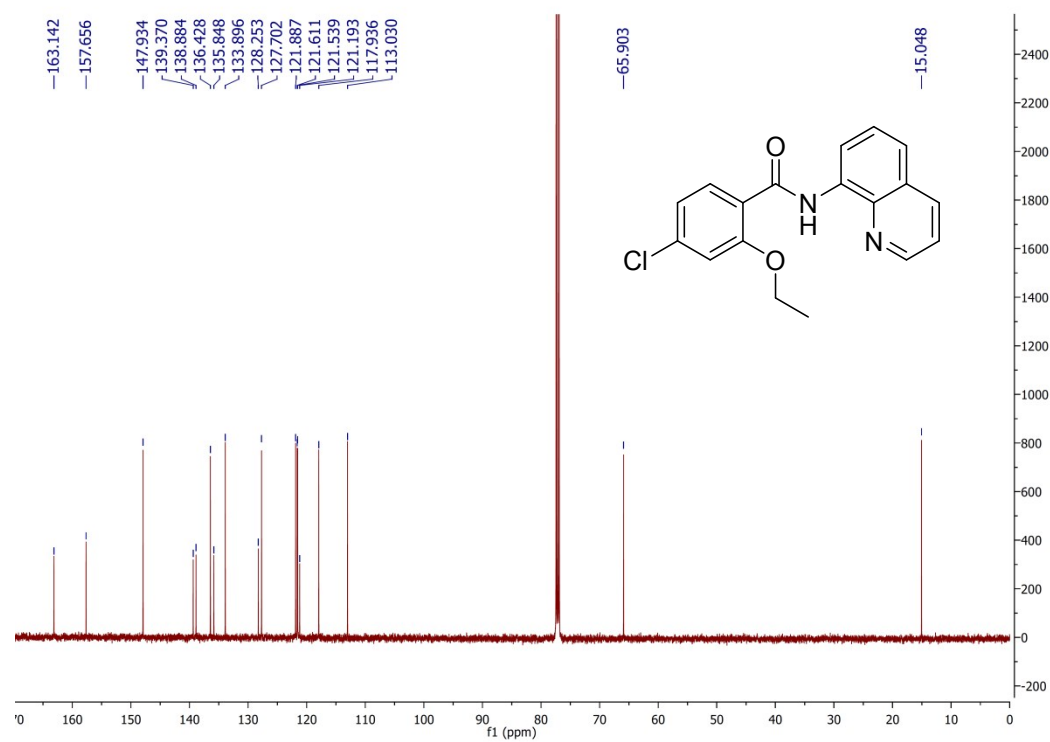



# 4-Methoxy-N-(quinolin-8-yl)benzamide

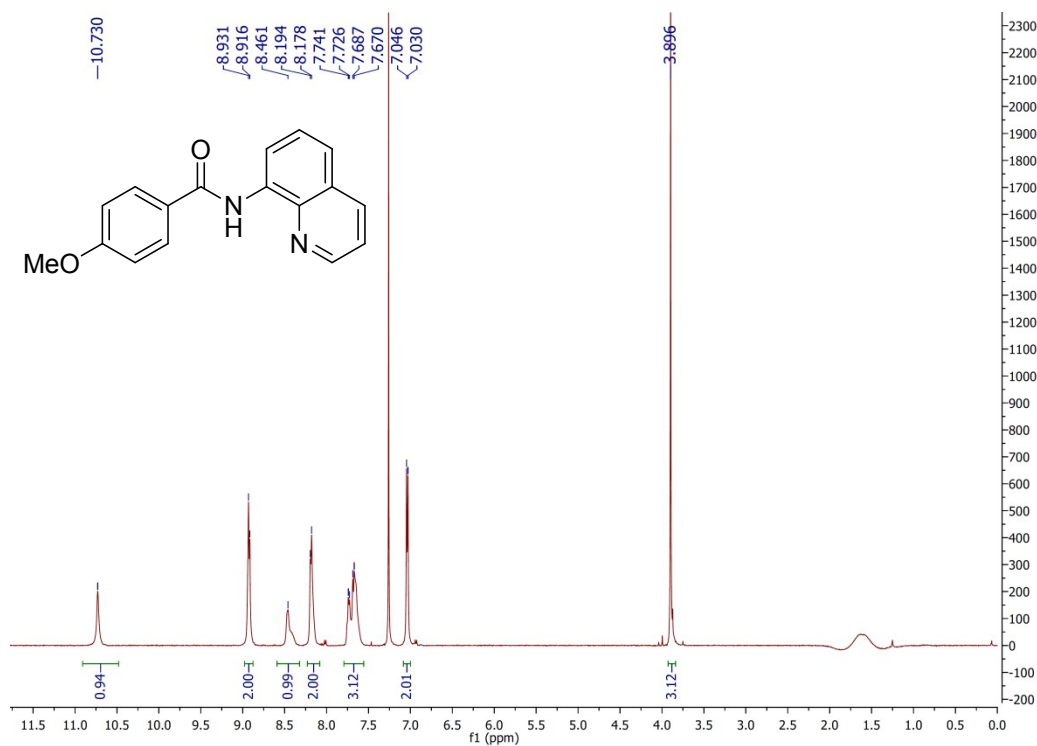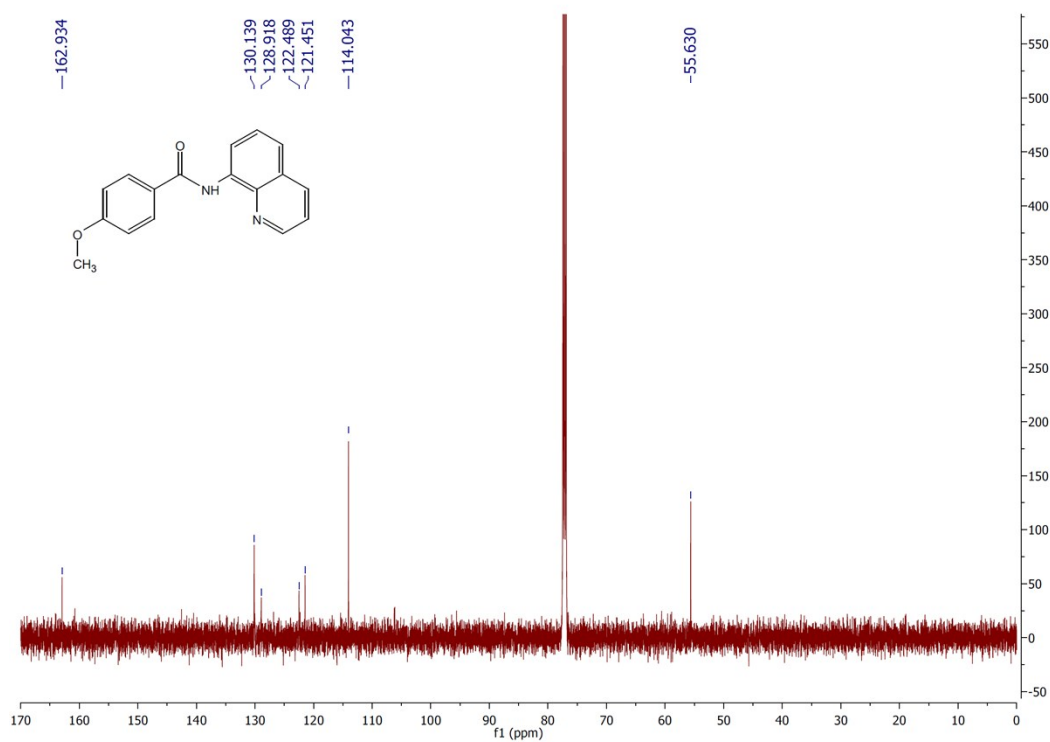

## 2-Ethoxy-4-methoxy-*N*-(quinolin-8-yl)benzamide

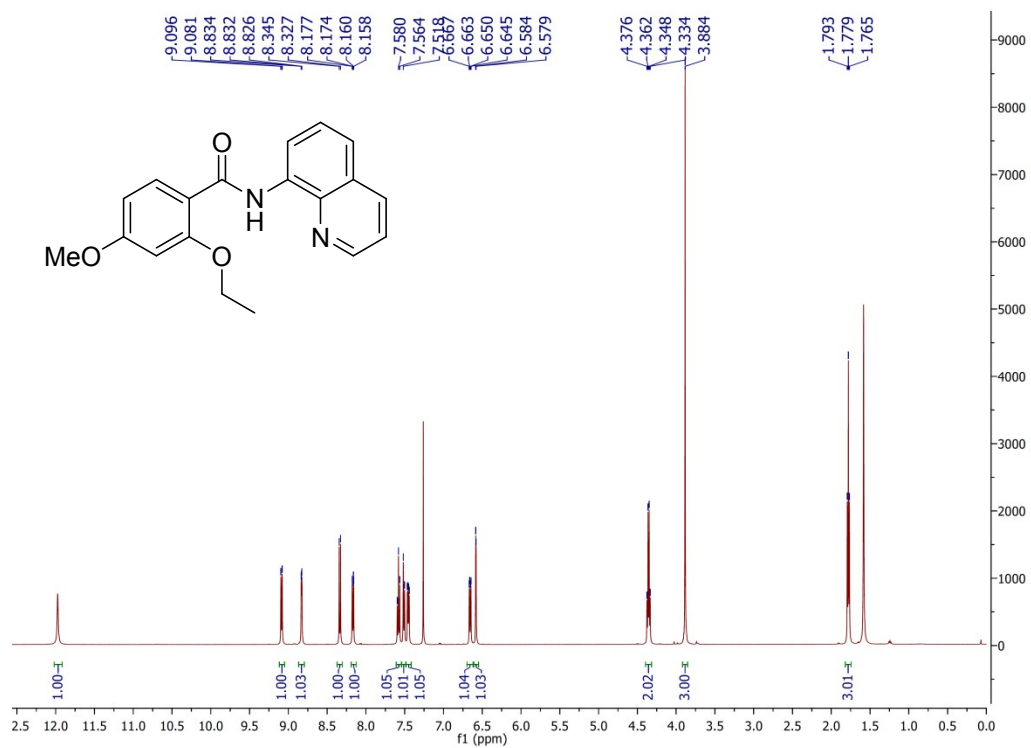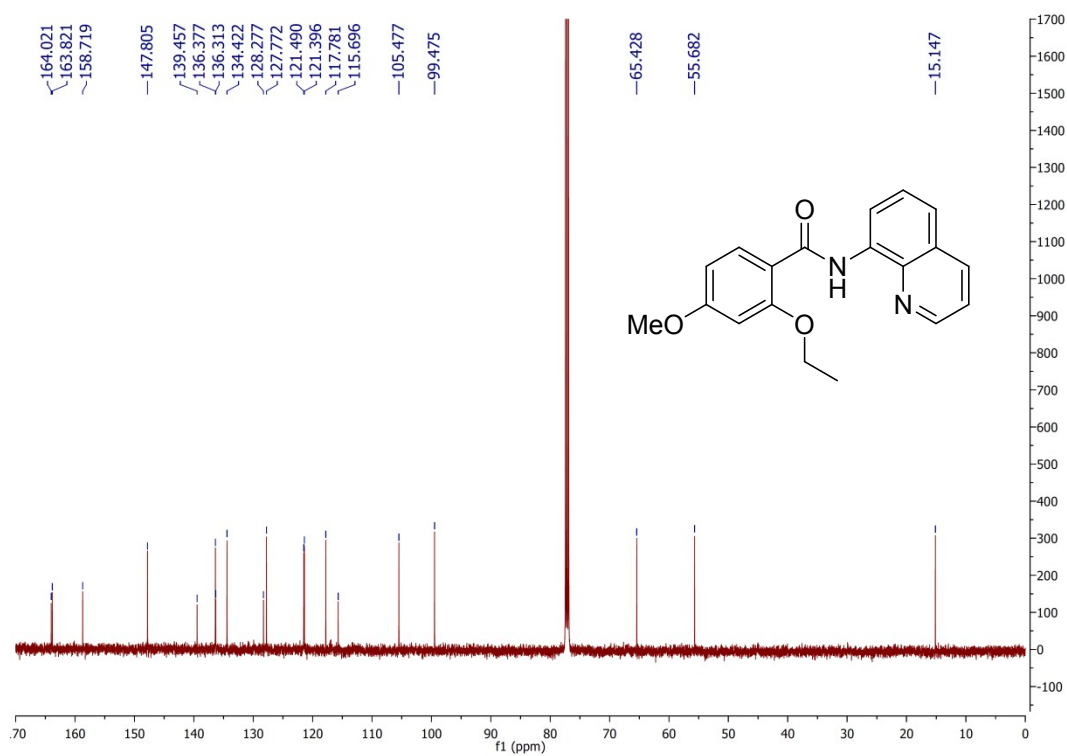

## 2-Methyl-N-(quinolin-8-yl)benzamide

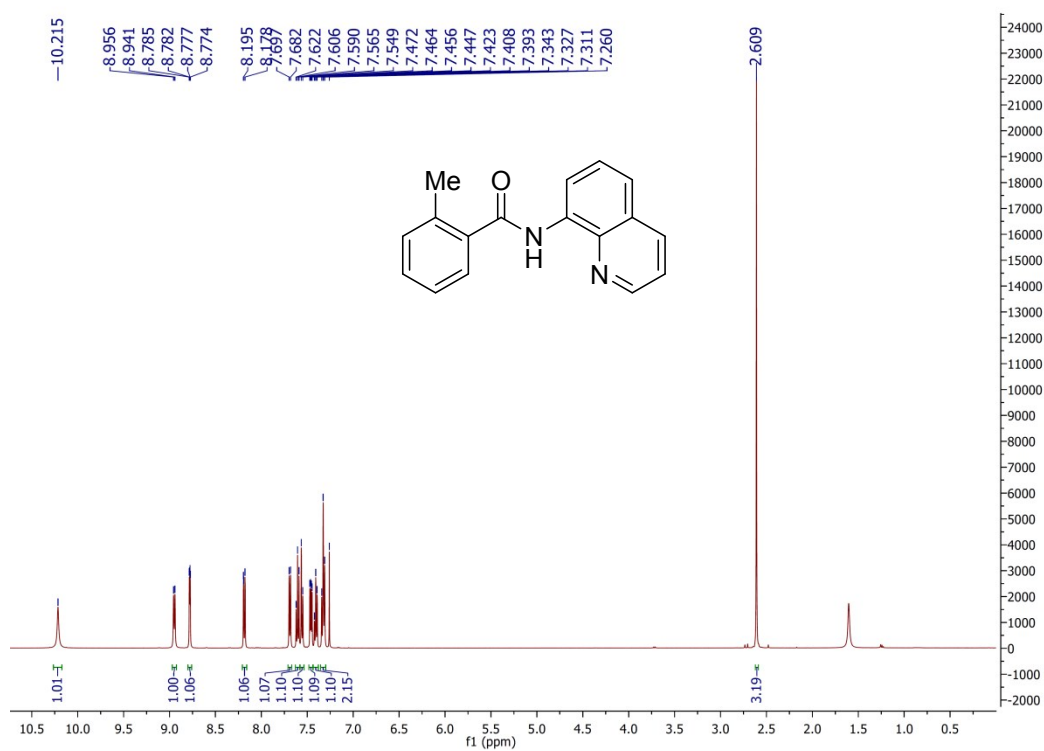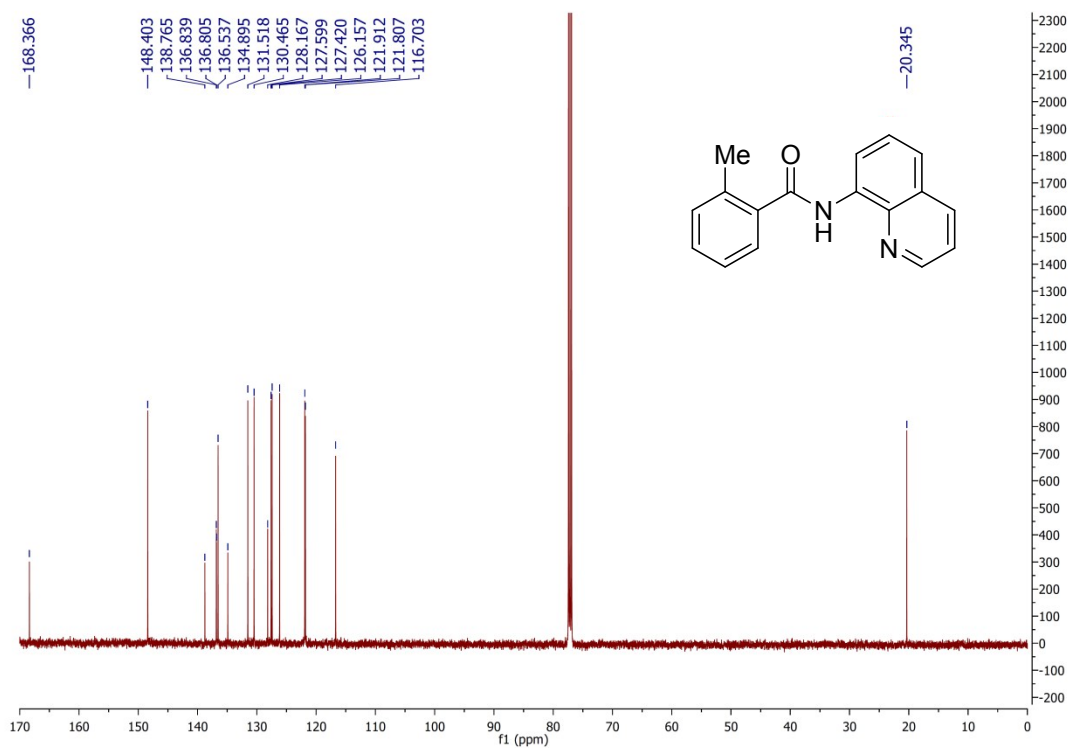

## 2-Ethoxy-4-methyl-N-(quinolin-8-yl)benzamide

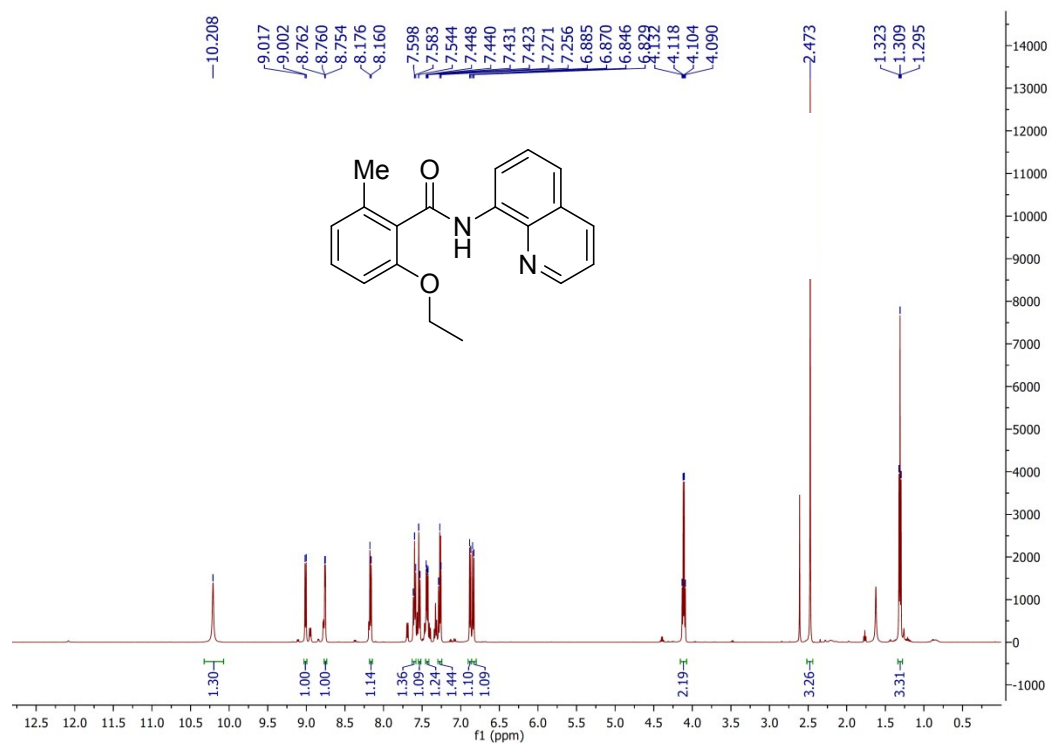

**3-Bromo-*N*-(quinolin-8-yl)benzamide**

### 3-Bromo-2-ethoxy-*N*-(quinolin-8-yl)benzamide

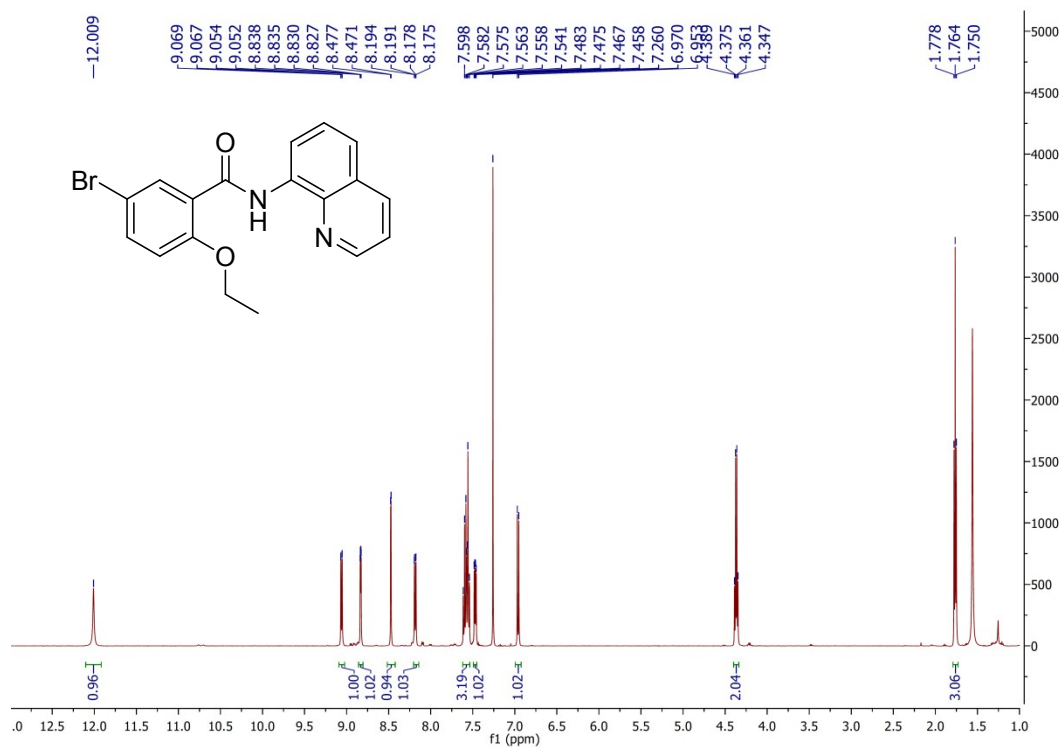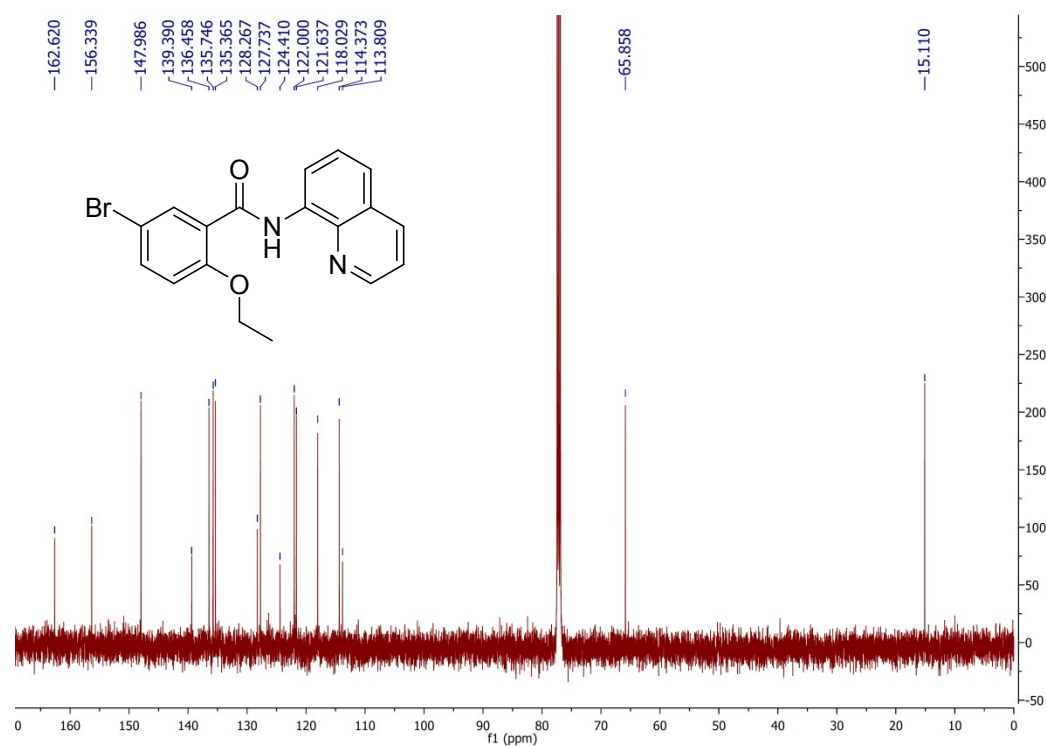

Supplement: c7ra12010a1.pdf [file c7ra12010a1.pdf]
